# Supplementary material for: USP44 regulates irradiation-induced DNA double-strand break repair and suppresses tumorigenesis in nasopharyngeal carcinoma
Source: PubMed Central journal article supplement (PMC8789930; doi:10.1038/s41467-022-28158-2), 2022-01-25
Supplement: 41467_2022_28158_MOESM1_ESM.pdf [file 41467_2022_28158_MOESM1_ESM.pdf]

## **Supplementary Information**

**USP44 regulates irradiation-induced DNA double-strand break repair and suppresses tumorigenesis in nasopharyngeal carcinoma**

**Chen et al.,**

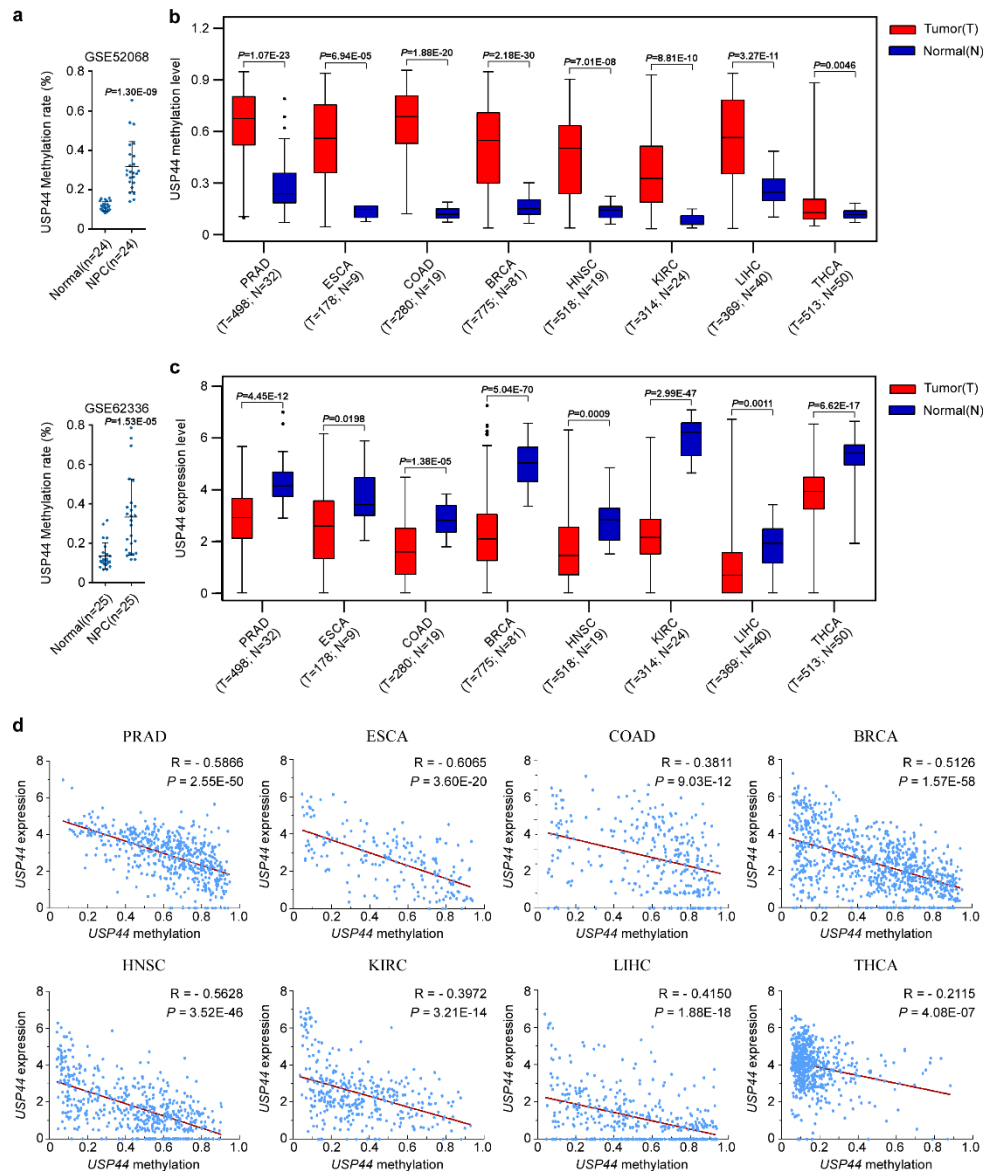

### Supplementary Fig. 1 (Extended data for Main Fig. 1)

**a**, Methylation level of the CpG site (cg00927554) in the promoter region of *USP44* based on genome-wide methylation microarray data (GSE52068 and GSE62336). **b,c**, *USP44* methylation levels (**b**) and expression levels (**c**) in different tumors and normal tissues based on The Cancer Genome Atlas (TCGA) database are shown in box plots, with the horizontal lines representing the median; the bottom and top of the boxes representing the 25th and 75th confidence limits; and the vertical bars representing the range of data. **d**, The correlation analysis of *USP44* methylation and mRNA expression levels in different tumors from TCGA database. Data are analyzed using the spearman correlation. Abbreviations: PRAD, prostate adenocarcinoma; ESCA, esophageal carcinoma; COAD, colon adenocarcinoma; BRCA, breast invasive carcinoma; HNSC, head and neck squamous cell carcinoma; KIRC, kidney renal clear cell carcinoma; LIHC, liver hepatocellular carcinoma; THCA, thyroid carcinoma. Data in a-c as mean  $\pm$  SD; the *P* values were determined using the two-tailed Student's *t*-test. Source data are provided as a Source Data file.

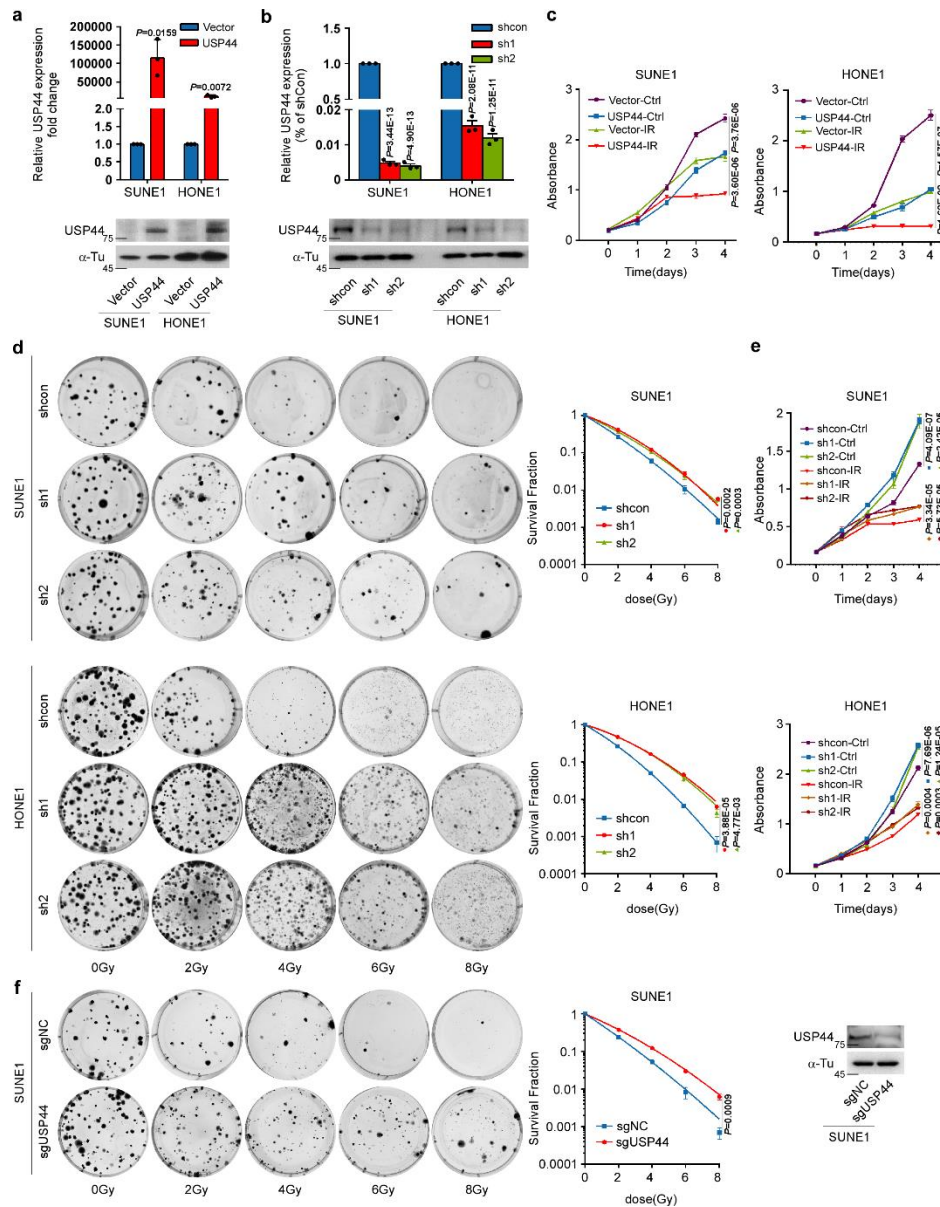

**Supplementary Fig. 2** (Extended data for Main Fig. 2)

**a,b**, RT-PCR and western blot analysis of SUNE1 and HONE1 cells with USP44 overexpression (**a**) or knockdown (**b**). The empty vector or HA-USP44 plasmids were stably transfected into SUNE1 or HONE1 cells. The control or shUSP44 plasmids (sh1 or sh2) were transiently transfected into SUNE1 or HONE1 cells with stable USP44 overexpression. **c**, CCK-8 assay of SUNE1 and HONE1 cells stably transfected with USP44 or the empty vector plasmids after exposure to 6Gy IR. **d,e**, Clonogenic assays and survival fraction curves (**d**) after exposure to indicated IR, as well as CCK-8 assay (**e**) after exposure to 6Gy IR of SUNE1 and HONE1 cells with USP44 knockdown or not. The control or shUSP44 plasmids (sh1 or sh2) were transiently transfected into SUNE1 or HONE1 cells with stable USP44 overexpression. **f**, Clonogenic assays and survival fraction curves after exposure to indicated IR of sgNC or sgUSP44 SUNE1 cells. The sgNC or sgUSP44 cells were constructed upon SUNE1 cells with stable USP44 overexpression. Data are presented as the mean  $\pm$  SD; the  $P$  values were determined using the two-tailed Student's  $t$ -test;  $n = 3$  (a,b,d,f) and  $n = 4$  (c,e) independent experiments. Source data are provided as a Source Data file.

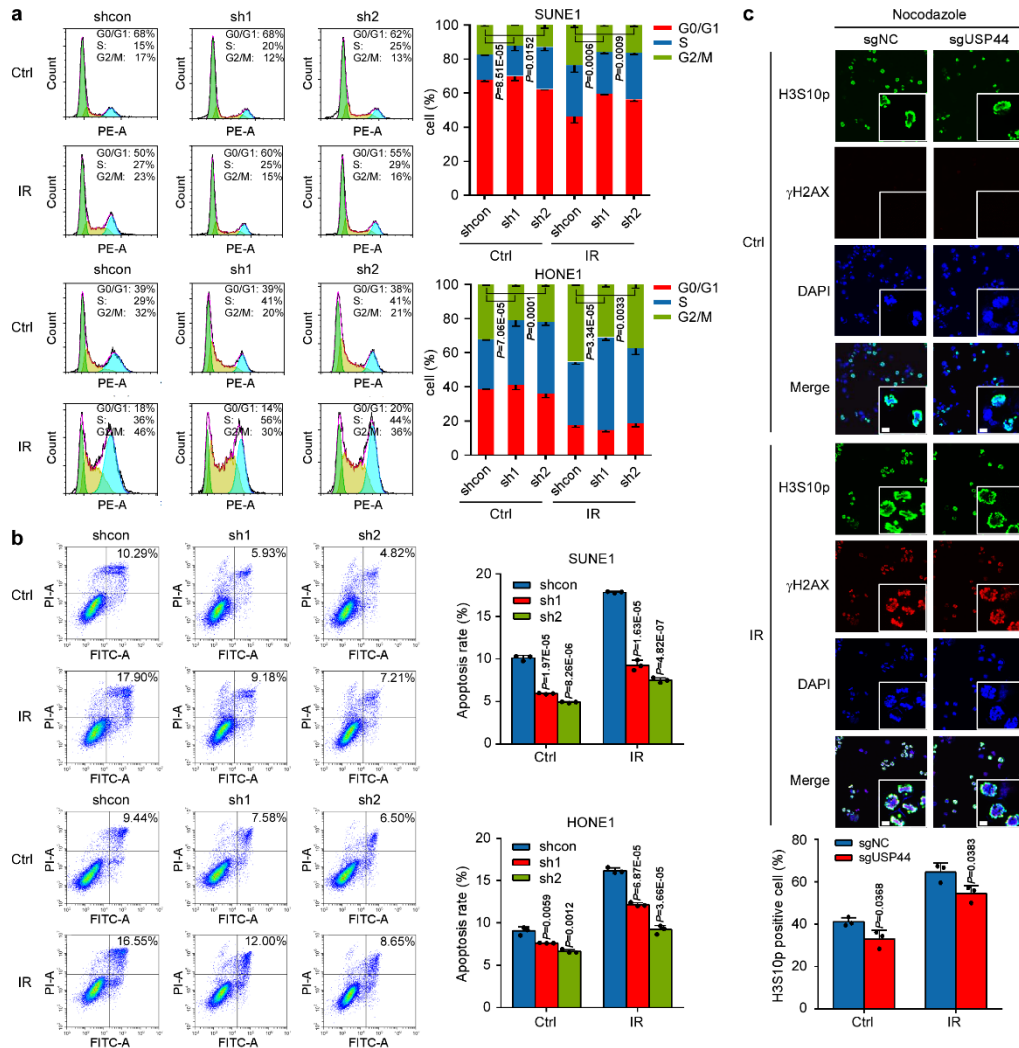

**Supplementary Fig. 3** (Extended data for Main Fig. 2)

**a,b**, Cell cycle distribution (**a**) and apoptosis rate (**b**) of *USP44* knocked-down SUNE1 and HONE1 cells with or without exposure to 6Gy IR. The control or sh*USP44* plasmids (sh1 or sh2) were transiently transfected into SUNE1 or HONE1 cells with stable *USP44* overexpression. Cell cycle distribution was detected at 8h after IR and apoptosis rate was detected at 24h after IR. **c**, The representative images and the percentage of H3S10<sub>p</sub> positive cells were analyzed by immunofluorescence staining in sgNC or sg*USP44* SUNE1 cells treated with nocodazole (0.1 μg/ml) for 18 hours before IR treatment (6 Gy, 0.5 h) or not. Scale bar, 10μm. The sgNC or sg*USP44* cells were constructed upon SUNE1 cells with stable *USP44* overexpression. Data in a-c are presented as the mean ± SD; the *P* values were determined using the two-tailed Student's *t*-test; *n* = 3 independent experiments. Source data are provided as a Source Data file.

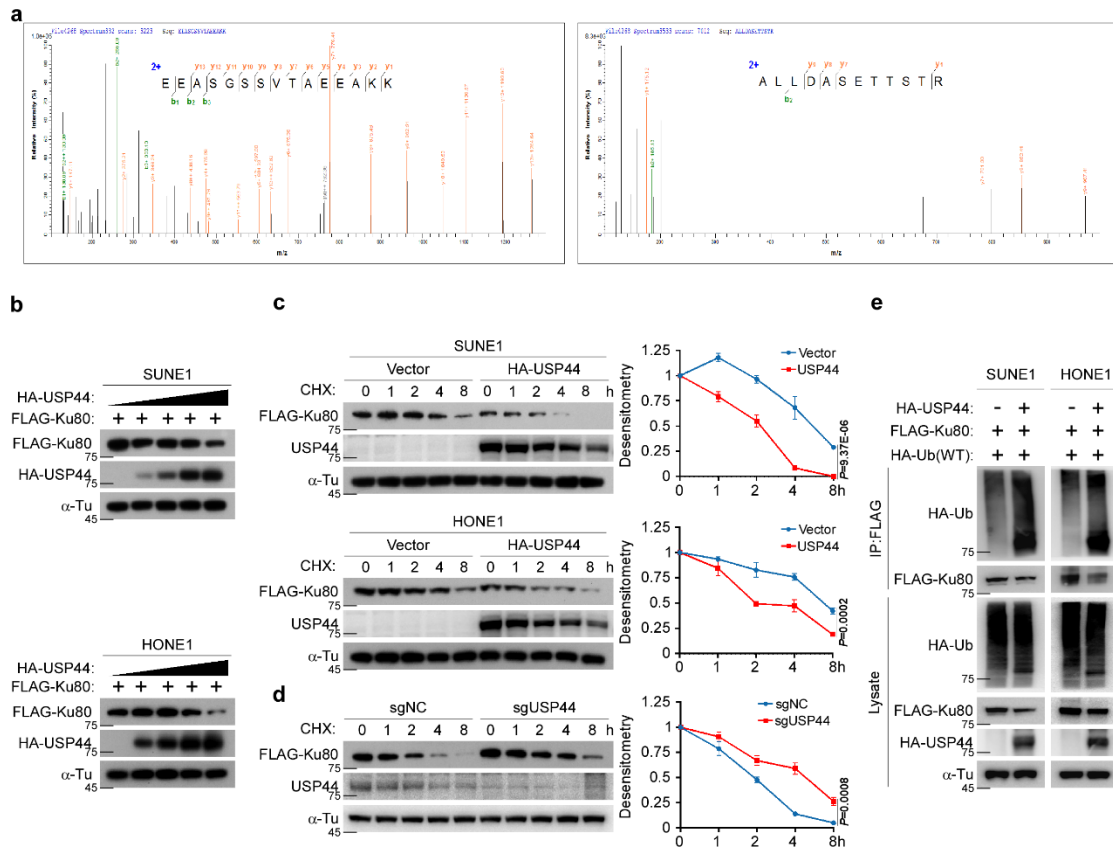

**Supplementary Fig. 4** (Extended data for main Fig. 3)

**a**, USP44 junction-specific peptides of Ku80 (left) or TRIM25 (right) were identified with immunoprecipitation of anti-HA antibody in SUNE1 cells stably overexpressing HA-USB44. **b**, USP44, in a dose-dependent manner, inhibited Ku80 protein expression in SUNE1 and HONE1 cells. **c**, The effect of CHX treatment and its gray analysis in SUNE1 and HONE1 cells transfected with FLAG-Ku80 and HA-USB44 or the empty vector plasmids. **d**, The effect of CHX treatment and greyscale analysis of the results in sgNC or sgUSB44 SUNE1 cells transfected with FLAG-Ku80. **e**, SUNE1 and HONE1 cells transfected with FLAG-Ku80, HA-Ub and HA-USB44 or the empty vector plasmids were subjected to denature-IP and immunoblotted with the indicated antibodies. Data in **c** are presented as the mean  $\pm$  SD; the *P* values were determined using the two-tailed Student's *t*-test; *n* = 3 independent experiments. Source data are provided as a Source Data file.

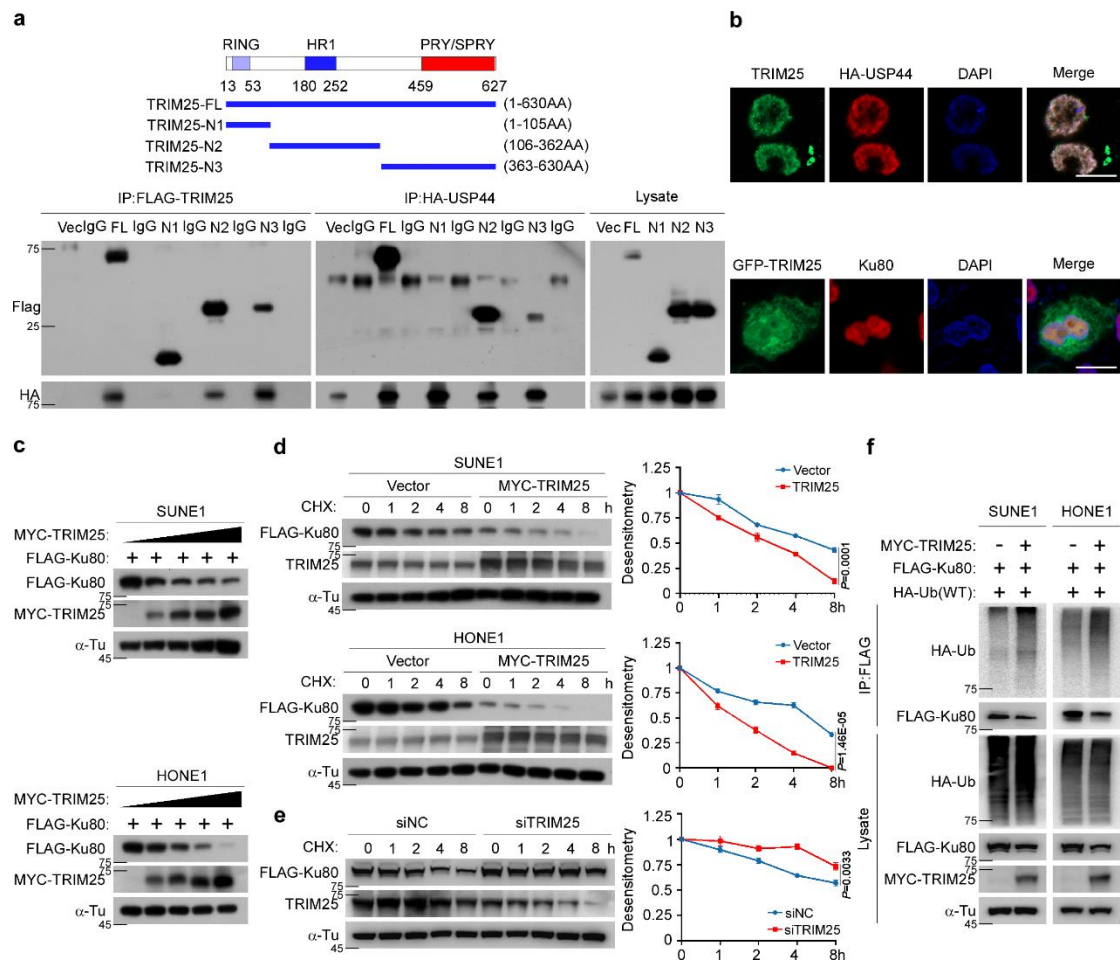

**Supplementary Fig. 5** (Extended data for main Fig. 3)

**a**, A structural diagram of *TRIM25* and schematic representation of Flag-tagged truncation mutants of *TRIM25*. 293T cells were transfected with HA-tagged *USP44* and Flag-tagged *TRIM25* (FL) or *TRIM25* truncation mutants. The cell lysates were collected and subjected to immunoprecipitation and immunoblotted with the indicated antibodies. **b**, Immunofluorescence staining revealed the cellular location of *TRIM25* and *USP44* or *Ku80* in SUNE1 cells at 0.5h after exposure to 6Gy IR. Scale bars, 10  $\mu$ m. **c**, *TRIM25*, in a dose-dependent manner, inhibited *Ku80* protein expression in SUNE1 and HONE1 cells. **d**, The effect of CHX treatment and its gray analysis in SUNE1 and HONE1 cells transfected with FLAG-*Ku80* and MYC-*TRIM25* or the empty vector plasmids. **e**, The effect of CHX treatment (left) and greyscale analysis of the results (right) in HONE1 cells transfected with FLAG-*Ku80* plus siNC or si*TRIM25*. **f**, SUNE1 and HONE1 cells transfected with FLAG-*Ku80*, HA-*Ub* and MYC-*TRIM25* or the empty vector plasmids were subjected to denature-IP and immunoblotted with the indicated antibodies. Data in d-e are presented as the mean  $\pm$  SD; two-tailed Student's *t*-test was used for statistical analysis; *n* = 3 independent experiments. Source data are provided as a Source Data file.

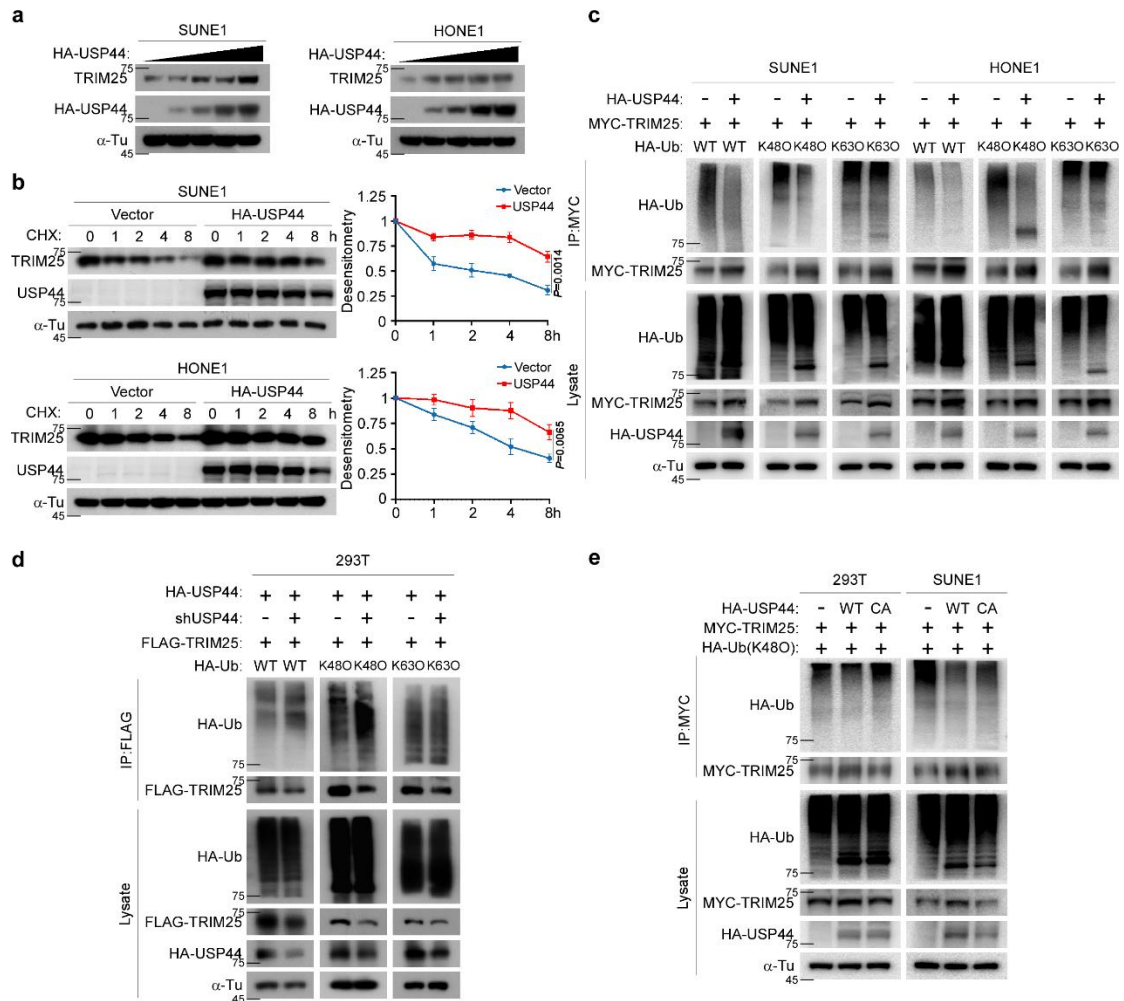

**Supplementary Fig. 6** (Extended data for main Fig. 4)

**a**, USP44, in a dose-dependent manner, promoted TRIM25 protein expression in SUNE1 and HONE1 cells. **b**, The effect of CHX treatment and its gray analysis in SUNE1 and HONE1 cells transfected with HA-USP44 or the empty vector plasmids. **c**, SUNE1 and HONE1 cells transfected with HA-USP44 or the empty vector were co-transfected with MYC-TRIM25 and a vector encoding HA-WT-Ub, HA-K48O-Ub or HA-K63O-Ub plasmids, were subjected to denature-IP and immunoblotted with the indicated antibodies. **d**, 293T cells equally transfected with HA-USP44 were co-transfected with shNC or shUSP44, FLAG-TRIM25 and a vector encoding HA-WT-Ub, HA-K48O-Ub or HA-K63O-Ub plasmids subjected to denature-IP and immunoblotted with the indicated antibodies. **e**, 293T and SUNE1 cells transfected with the vector plasmid, HA-USP44 or HA-USP44(C282A) together with MYC-TRIM25 and HA-K48O-Ub were subjected to denature-IP and immunoblotted with the indicated antibodies. Data in **b** are presented as the mean  $\pm$  SD; the *P* values were determined using the two-tailed Student's *t*-test; *n* = 3 independent experiments. Source data are provided as a Source Data file.

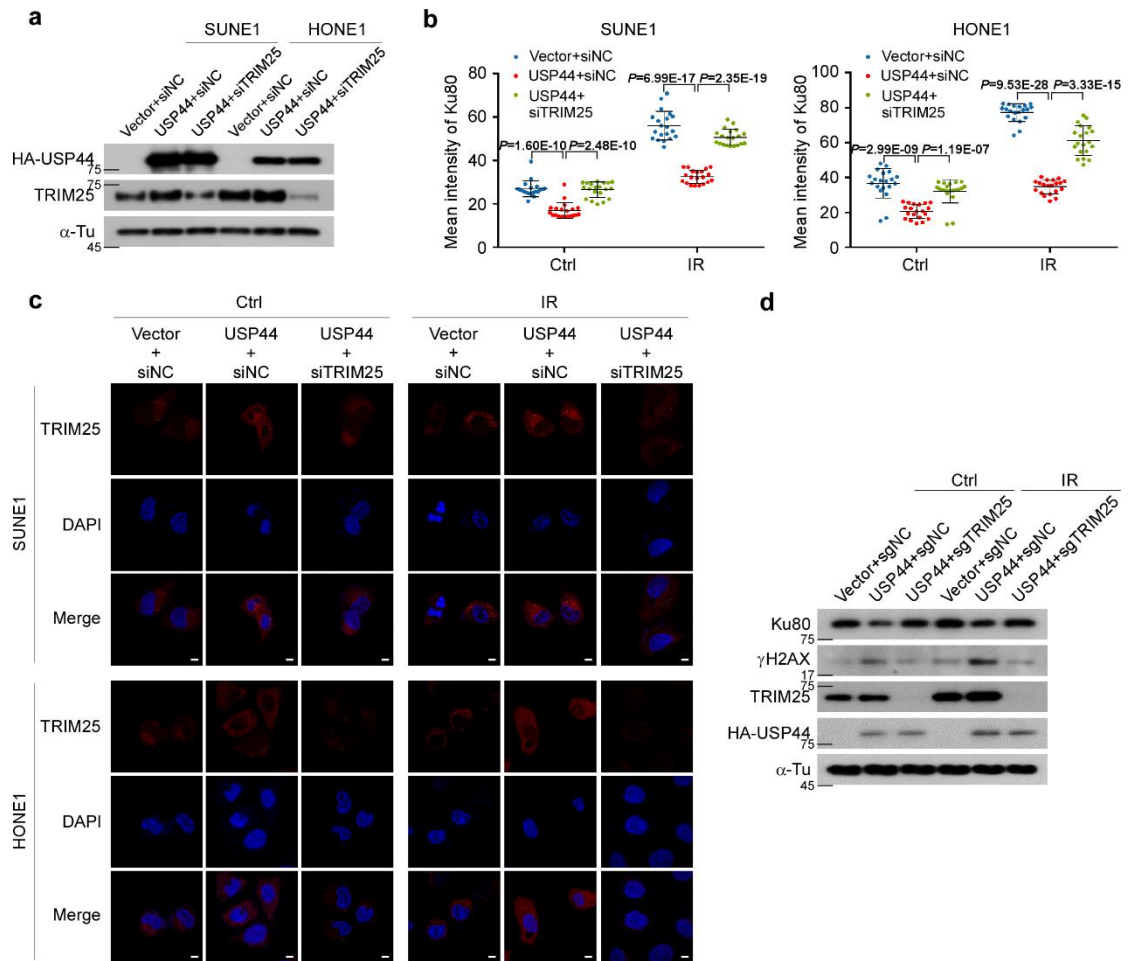

**Supplementary Fig. 7** (Extended data for Main Fig. 4)

**a**, The expression efficiency of NPC cells transfected with the indicated plasmids and siRNAs detected by the western blotting assay. **b**, The mean intensity of Ku80 fluorescence ( $n = 20$  cells per group) in Fig. 4j was quantified using ImageJ software. **c**, SUNE1 and HONE1 cells exposed to IR (6 Gy) transfected with the indicated plasmids and siRNAs were fixed 0.5 h later and co-immunostained with the TRIM25 antibody. Scale bars, 10  $\mu$ m. **d**, Western blot analysis of the Vector+sgNC, USP44+sgNC, and USP44+sgTRIM25 grouped SUNE1 cells with IR treatment (6 Gy, 0.5 h) or not. Data in b are presented as the mean  $\pm$  SD; the  $P$  values were determined using the two-tailed Student's  $t$ -test;  $n = 3$  independent experiments. Source data are provided as a Source Data file.



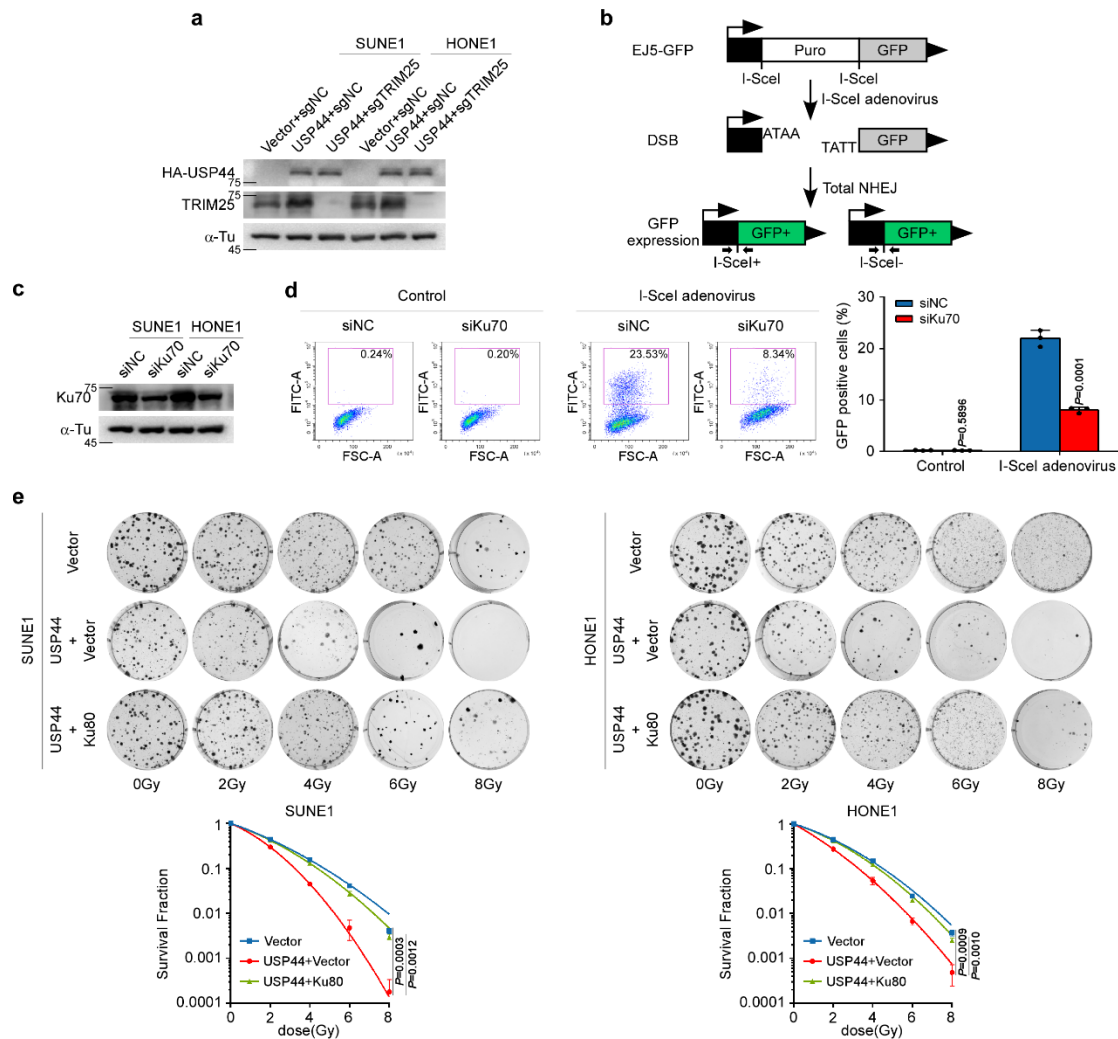

**Supplementary Fig. 8** (Extended data for Main Fig. 5-6)

**a**, Western blot analysis of the Vector+sgNC, *USP44*+sgNC, and *USP44*+sg*TRIM25* grouped SUNE1 and HONE1 cells. **b**, Schematic of the EJ5-GFP reporter used to monitor NHEJ repair in NPC cells (see text for details). **c**, Western blot analysis of SUNE1 and HONE1 cells transfected with siNC or si*Ku70*. **d**, The siNC or si*Ku70* SUNE1 cells were transfected with EJ5-GFP, infected with or without I-SceI-expressing adenovirus and analysed for GFP positivity by flow cytometry. **e**, Clonogenic assays and survival fraction curves after exposure to indicated IR of SUNE1 and HONE1 cells transiently co-transfected with HA-*USP44* or the empty vector plus FLAG-*TRIM25* or the empty vector plasmids. Data in d,e are presented as the mean  $\pm$  SD; the *P* values were determined using the two-tailed Student's *t*-test; *n* = 3 independent experiments. Source data are provided as a Source Data file.

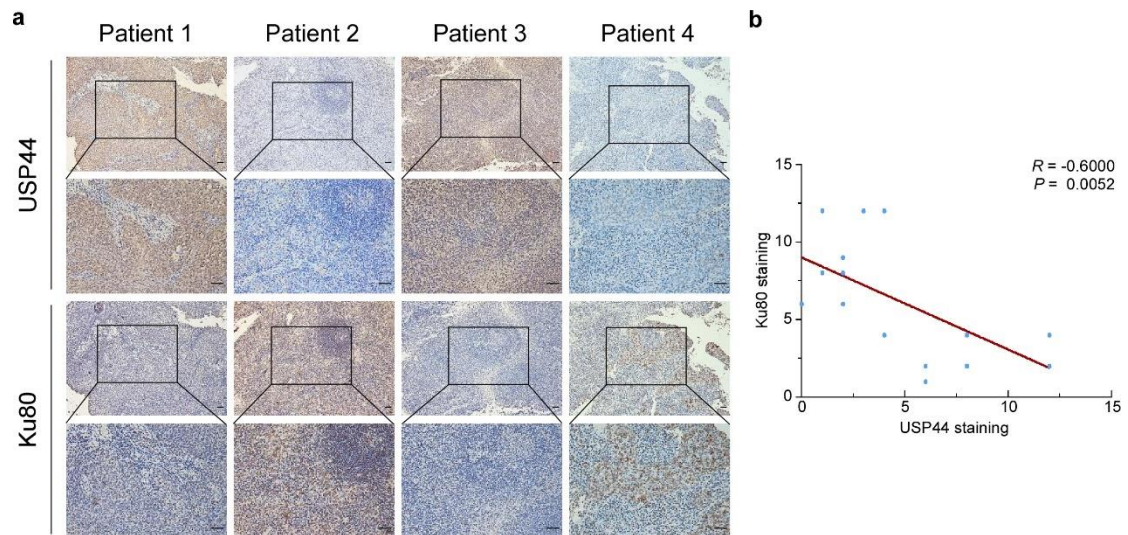

**Supplementary Fig. 9** (Extended data for Main Fig. 8)

**a**, Representative images of immunohistochemical staining anti-USP44 or anti-Ku80 in 20 NPC patients. Scale bars, 50  $\mu\text{m}$ . **b**, Correlation analysis of USP44 expression and Ku80 expression in NPC samples ( $n = 20$ ) according to IHC score statistics. Data are analyzed using the spearman correlation. Source data are provided as a Source Data file.

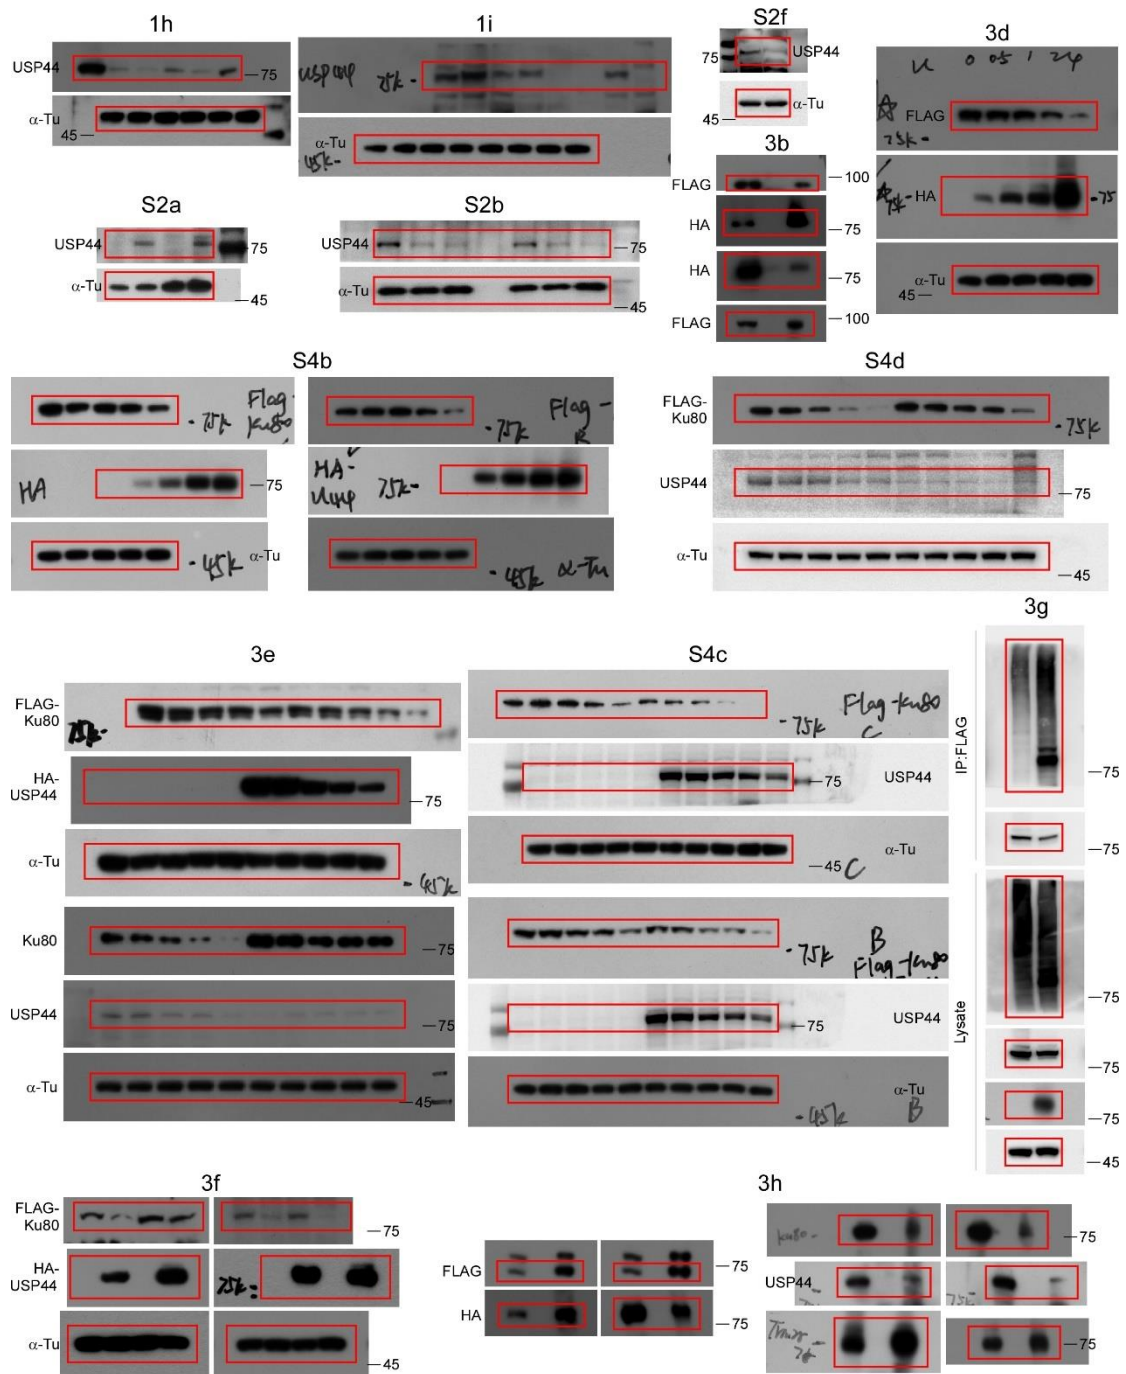

**Supplementary Fig. 10** (Unprocessed immunoblots)  
 Unprocessed immunoblots for indicated Figures panels.

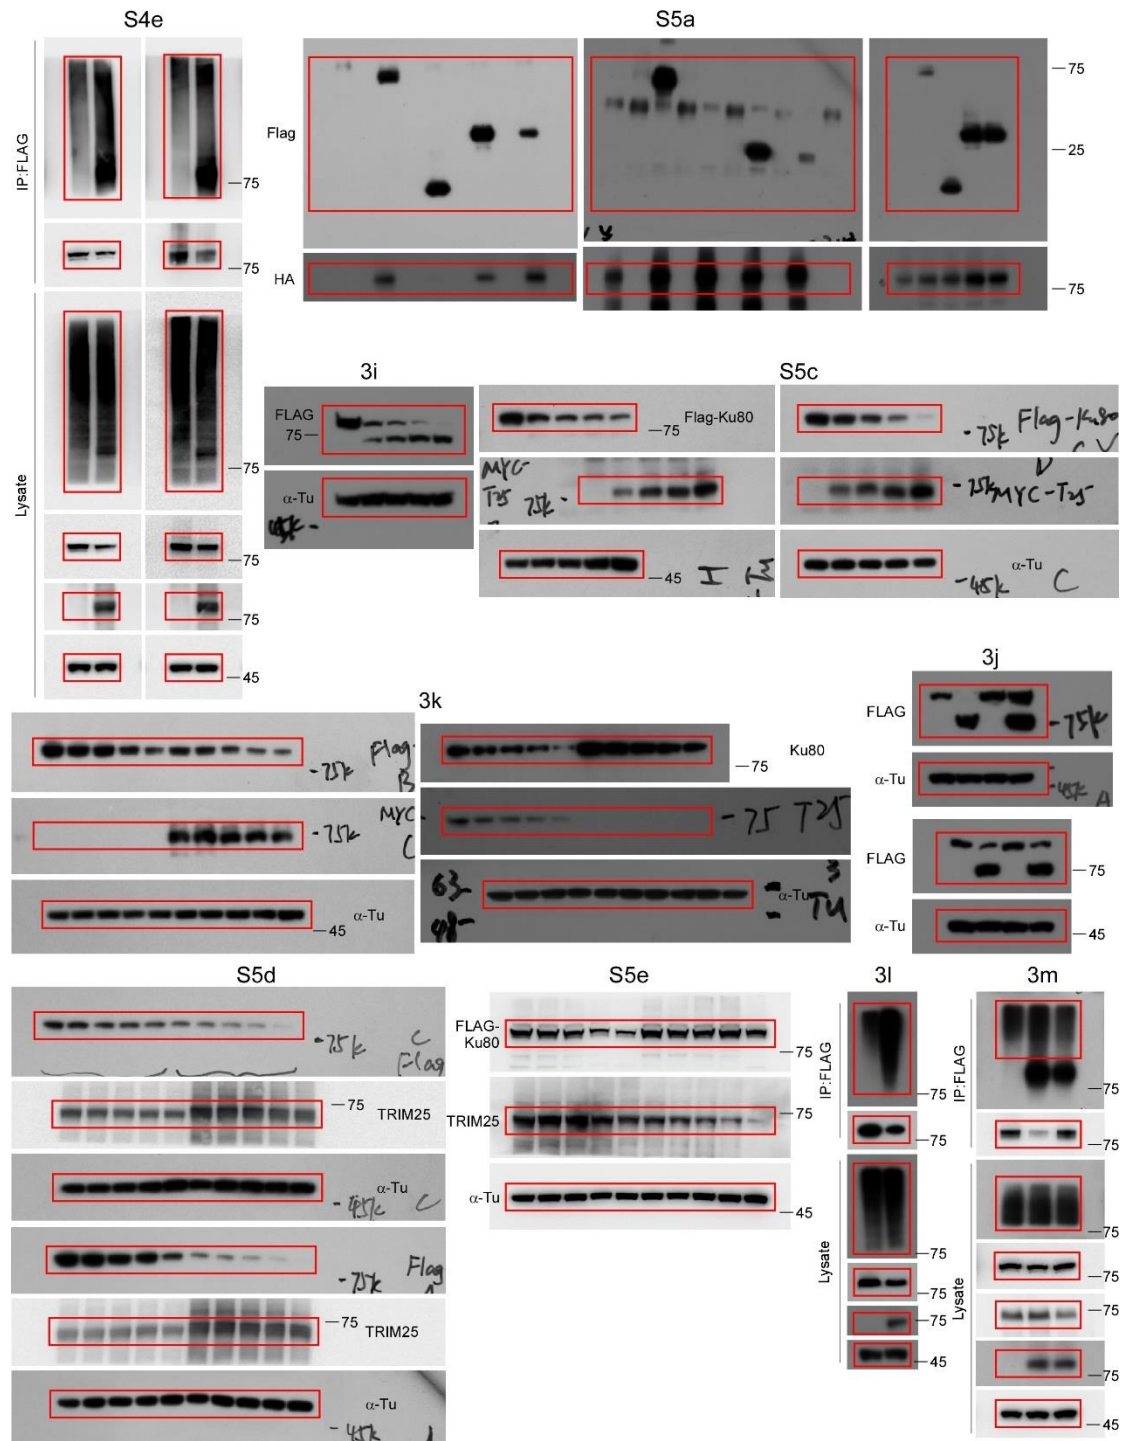

**Supplementary Fig. 10 (cont'd) (Unprocessed immunoblots (continued))**  
 Unprocessed immunoblots for indicated Figures panels.

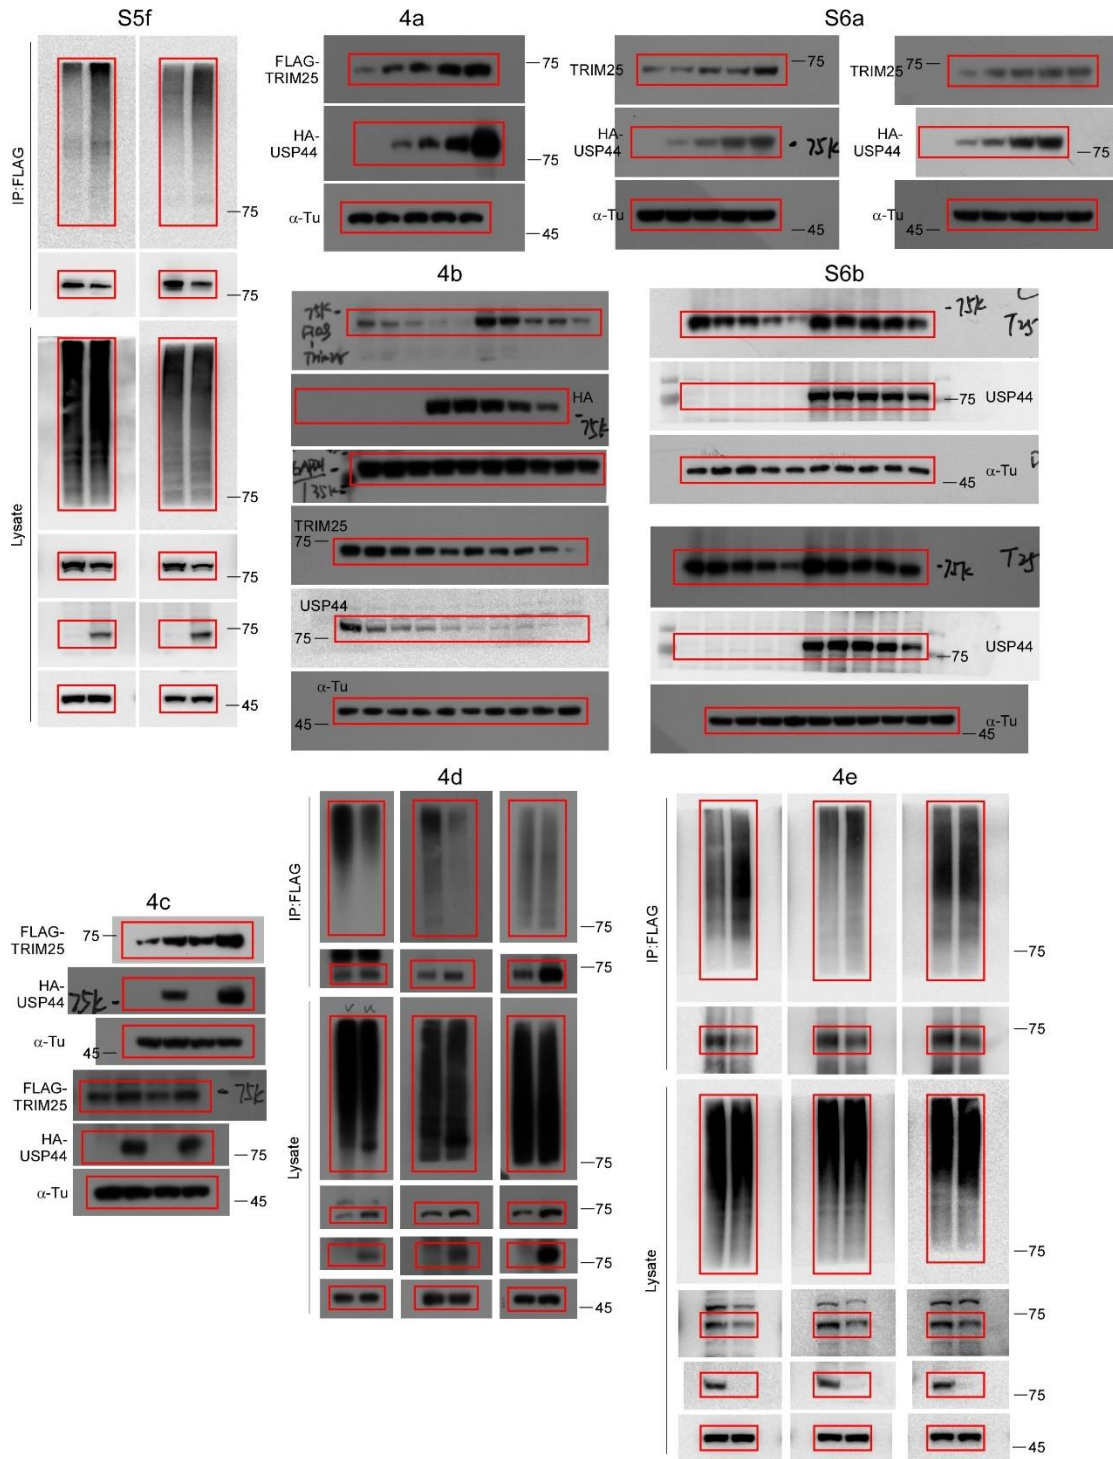

**Supplementary Fig. 10 (cont'd) (Unprocessed immunoblots (continued))**

Unprocessed immunoblots for indicated Figures panels.

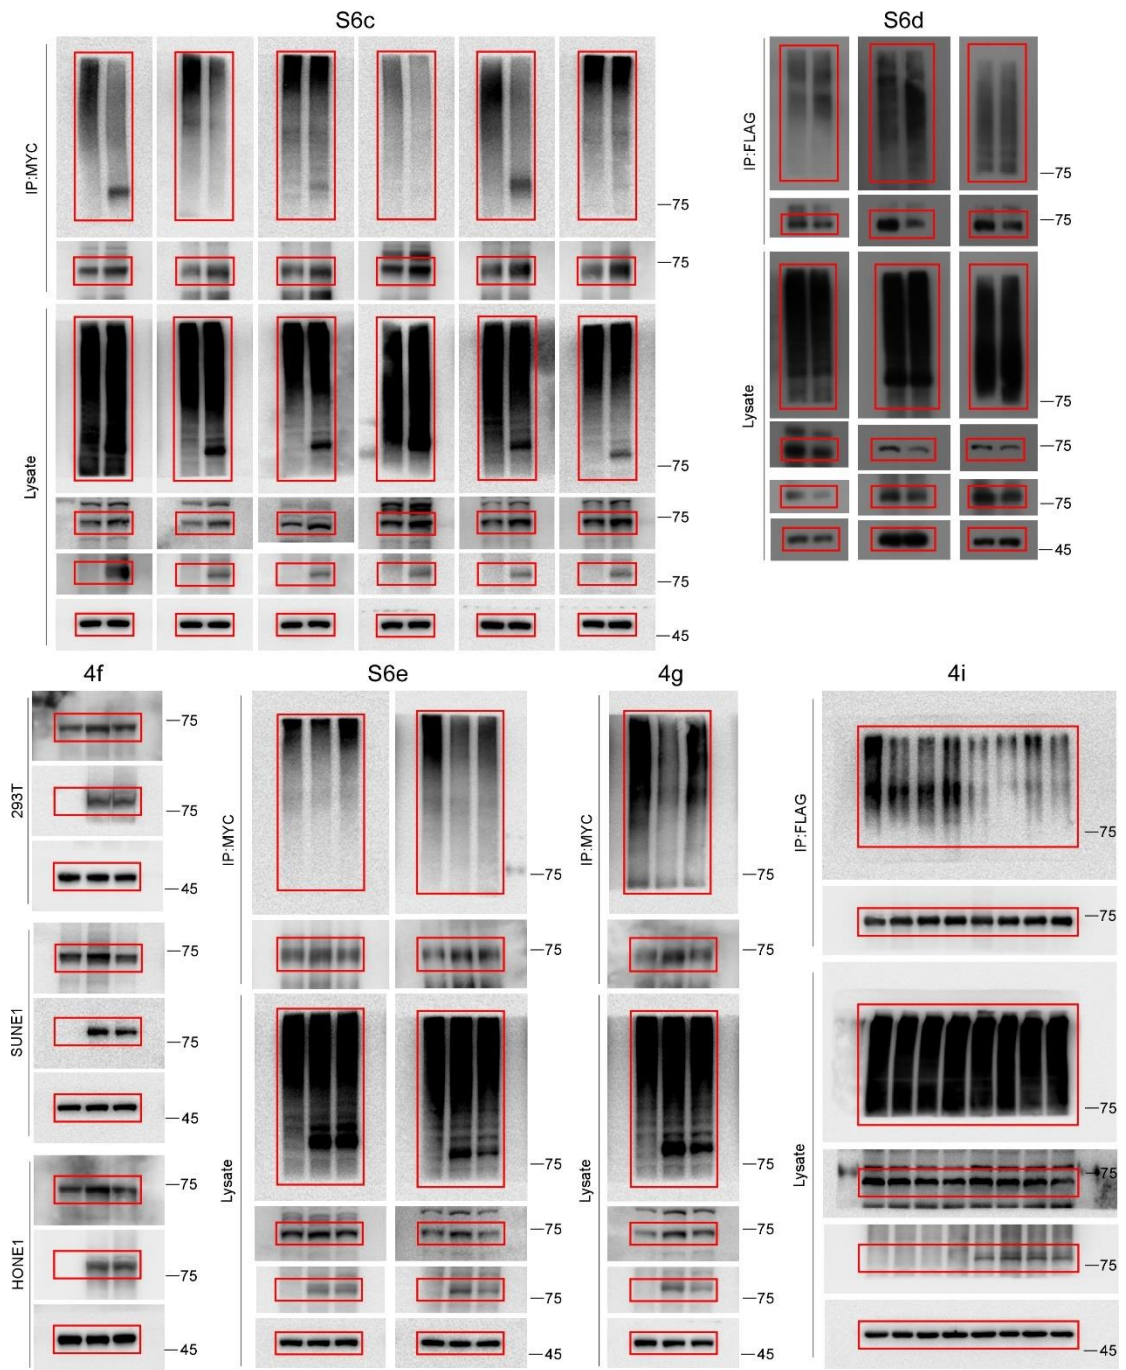

**Supplementary Fig. 10 (cont'd)** (Unprocessed immunoblots (continued))  
 Unprocessed immunoblots for indicated Figures panels.

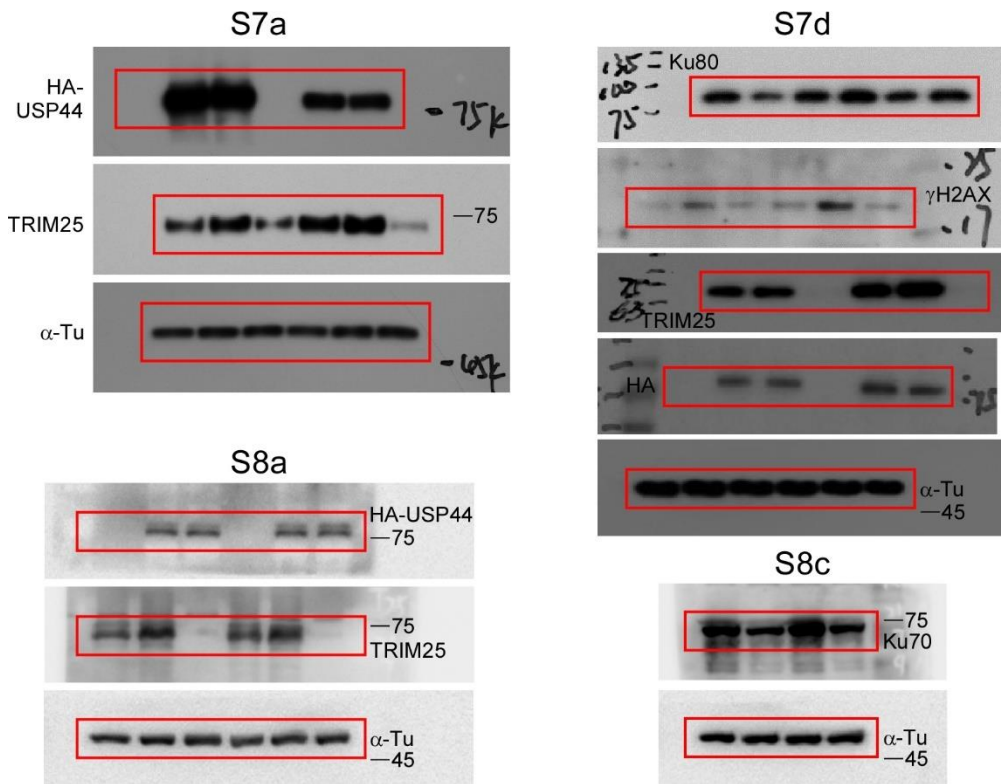

**Supplementary Fig. 10 (cont'd)** (Unprocessed immunoblots (continued))  
 Unprocessed immunoblots for indicated Figures panels.

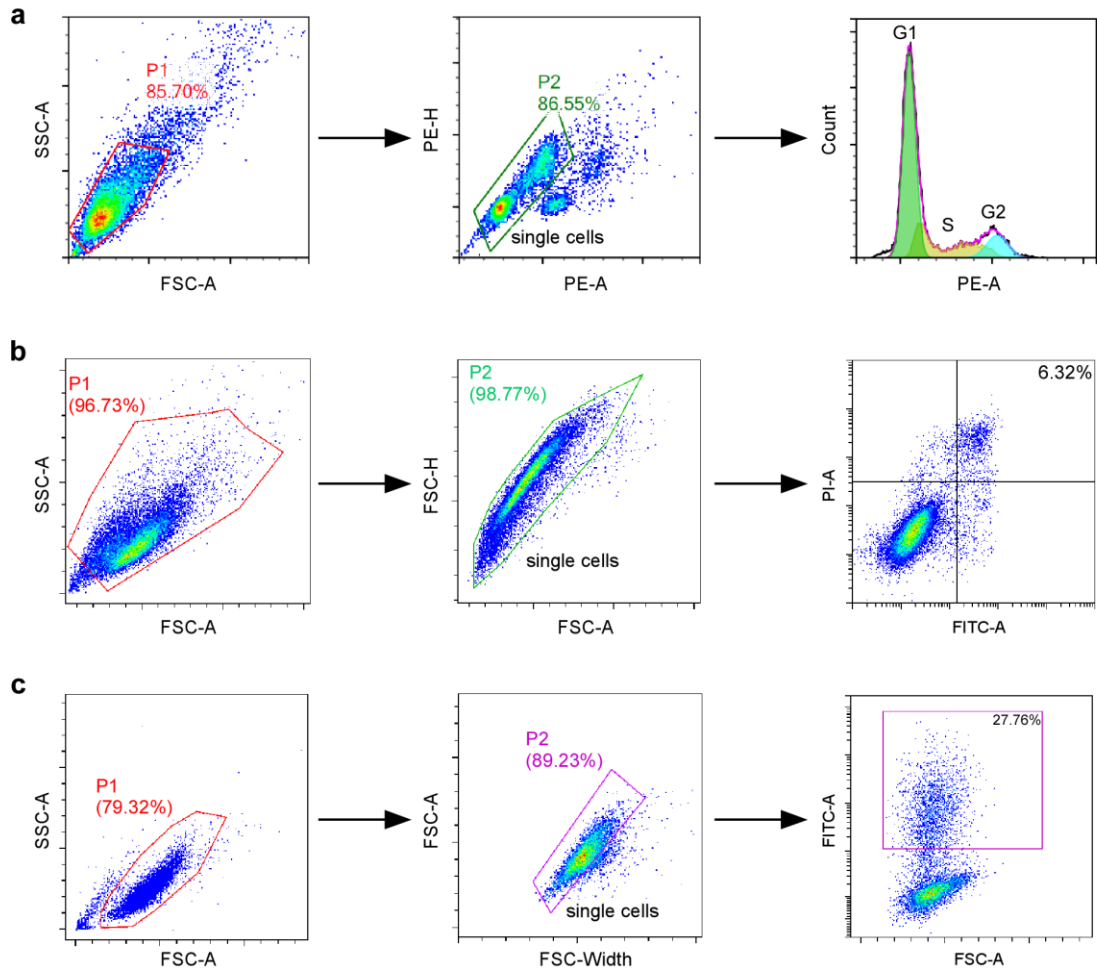

**Supplementary Fig. 11**

The gating strategy of Flow cytometry analysis



**Supplementary Table 1.** The USP44-interacting proteins identified by mass spectrometry in SUNE1 cells with stable USP44 overexpression.

| Accession        | Protein description                                                         | Score | Matches |
|------------------|-----------------------------------------------------------------------------|-------|---------|
| A0A024RBD7_HUMAN | Ubiquitin hydrolase 44                                                      | 3259  | 165     |
| A0A024R1N4_HUMAN | X-ray repair complementing defective repair in Chinese hamster cells 6      | 2709  | 114     |
| XRCC5_HUMAN      | X-ray repair cross-complementing protein 5                                  | 2036  | 125     |
| HSP7C_HUMAN      | Heat shock cognate 71                                                       | 1921  | 97      |
| LMNA_HUMAN       | Prelamin-A/C                                                                | 1392  | 70      |
| A0A1U9X7W4_HUMAN | HSPA1A                                                                      | 1116  | 58      |
| A0A024R9C1_HUMAN | Polyadenylate-binding protein                                               | 668   | 32      |
| HNRPM_HUMAN      | Heterogeneous nuclear ribonucleoprotein M                                   | 614   | 43      |
| BIP_HUMAN        | Endoplasmic reticulum chaperone BiP                                         | 597   | 27      |
| LAP2A_HUMAN      | Lamina-associated polypeptide 2, isoform alpha                              | 597   | 24      |
| B2R6X5_HUMAN     | cDNA, FLJ93166, highly similar to Homo sapiens heat shock 70kDa protein 6   | 548   | 27      |
| HNRPU_HUMAN      | Heterogeneous nuclear ribonucleoprotein U                                   | 480   | 21      |
| B7Z4V2_HUMAN     | cDNA FLJ51907, highly similar to Stress-70 protein, mitochondrial           | 446   | 18      |
| A0A0D9SF53_HUMAN | ATP-dependent RNA helicase DDX3X                                            | 442   | 30      |
| DHX9_HUMAN       | ATP-dependent RNA helicase A                                                | 388   | 29      |
| H3BNC9_HUMAN     | Uncharacterized protein                                                     | 386   | 21      |
| A0A024RCT9_HUMAN | High mobility group AT-hook 1, isoform CRA_b                                | 351   | 19      |
| A0A024R228_HUMAN | Heterogeneous nuclear ribonucleoprotein K, isoform CRA_d                    | 328   | 16      |
| B4DN41_HUMAN     | cDNA FLJ53366, highly similar to Probable ATP-dependent RNA helicase DDX5   | 300   | 18      |
| A0A0S2Z428_HUMAN | HCG2039812, isoform CRA_b (Fragment)                                        | 299   | 19      |
| A0A1W2PQ51_HUMAN | Probable ATP-dependent RNA helicase DDX17                                   | 295   | 17      |
| A0A0C4DGB6_HUMAN | Serum albumin                                                               | 265   | 16      |
| RS18_HUMAN       | 40S ribosomal protein S18                                                   | 231   | 8       |
| A0A024RD80_HUMAN | Heat shock protein 90kDa alpha (Cytosolic), class B member 1, isoform CRA_a | 212   | 14      |
| D7RXV9_HUMAN     | DING protein p38                                                            | 202   | 4       |
| A0A024R609_HUMAN | Pyruvate kinase                                                             | 198   | 10      |
| A0A024R5Z9_HUMAN | Pyruvate kinase                                                             | 197   | 11      |
| EZRI_HUMAN       | Ezrin                                                                       | 197   | 11      |
| A0A0S2Z4Z0_HUMAN | RNA binding motif protein 14 isoform 1 (Fragment)                           | 184   | 10      |
| RBP56_HUMAN      | TATA-binding protein-associated factor 2N                                   | 150   | 4       |

| Accession        | Protein description                                                      | Score | Matches |
|------------------|--------------------------------------------------------------------------|-------|---------|
| A0A024R4F1_HUMAN | Enolase 1, (Alpha), isoform CRA_a                                        | 142   | 9       |
| RPN1_HUMAN       | Dolichyl-diphosphooligosaccharide--protein glycosyltransferase subunit 1 | 140   | 9       |
| RL12_HUMAN       | 60S ribosomal protein L12                                                | 140   | 6       |
| MOES_HUMAN       | Moesin OS=Homo sapiens                                                   | 139   | 7       |
| HS90A_HUMAN      | Heat shock protein HSP 90-alpha                                          | 138   | 9       |
| A0A075B6Z2_HUMAN | T cell receptor alpha joining 56 (Fragment)                              | 137   | 26      |
| RS25_HUMAN       | 40S ribosomal protein S25 OS=Homo sapiens                                | 136   | 8       |
| F8WJN3_HUMAN     | Cleavage and polyadenylation-specificity factor subunit 6                | 136   | 4       |
| E9PK25_HUMAN     | Cofilin-1                                                                | 129   | 4       |
| RL35_HUMAN       | 60S ribosomal protein L35                                                | 128   | 7       |
| K7EJ78_HUMAN     | 40S ribosomal protein S15                                                | 120   | 8       |
| ACTB_HUMAN       | Actin, cytoplasmic 1                                                     | 117   | 5       |
| MISP_HUMAN       | Mitotic interactor and substrate of PLK1                                 | 104   | 6       |
| RS13_HUMAN       | 40S ribosomal protein S13                                                | 103   | 7       |
| TCPG_HUMAN       | T-complex protein 1 subunit gamma                                        | 102   | 5       |
| B1ANR0_HUMAN     | Polyadenylate-binding protein                                            | 99    | 5       |
| K7EJV9_HUMAN     | 60S ribosomal protein L23a (Fragment)                                    | 98    | 2       |
| GRN_HUMAN        | Granulins                                                                | 96    | 5       |
| V9HW68_HUMAN     | Epididymis luminal protein 214                                           | 90    | 12      |
| A0A024R3X4_HUMAN | Heat shock 60kDa protein 1 (Chaperonin), isoform CRA_a                   | 87    | 3       |
| B4E022_HUMAN     | cDNA FLJ56274, highly similar to Transketolase (EC 2.2.1.1)              | 86    | 3       |
| A0A087WVQ9_HUMAN | Elongation factor 1-alpha 1                                              | 85    | 3       |
| TCPD_HUMAN       | T-complex protein 1 subunit delta                                        | 84    | 3       |
| M0QZC5_HUMAN     | 40S ribosomal protein S11                                                | 83    | 8       |
| A0A024R4A0_HUMAN | Nucleolin, isoform CRA_b                                                 | 81    | 5       |
| A0A0F7KYT8_HUMAN | Fragile X mental retardation autosomal homolog variant p2K               | 79    | 3       |
| LPPRC_HUMAN      | Leucine-rich PPR motif-containing protein, mitochondrial                 | 79    | 2       |
| ANM5_HUMAN       | Protein arginine N-methyltransferase 5                                   | 76    | 8       |
| A0A024RA28_HUMAN | Heterogeneous nuclear ribonucleoprotein A2/B1, isoform CRA_d             | 74    | 1       |
| TCPB_HUMAN       | T-complex protein 1 subunit beta                                         | 72    | 2       |
| A0A0G2JPR0_HUMAN | Complement C4-A                                                          | 71    | 2       |
| H0YKD8_HUMAN     | 60S ribosomal protein L28                                                | 71    | 3       |
| HORN_HUMAN       | Hornerin                                                                 | 70    | 3       |
| A0A1W2PQM2_HUMAN | Tubulin alpha-1C chain                                                   | 69    | 2       |
| NDKA_HUMAN       | Nucleoside diphosphate kinase A                                          | 68    | 5       |

| <b>Accession</b> | <b>Protein description</b>                                                                                      | <b>Score</b> | <b>Matches</b> |
|------------------|-----------------------------------------------------------------------------------------------------------------|--------------|----------------|
| Q08ES8_HUMAN     | Cell growth-inhibiting protein 34                                                                               | 67           | 2              |
| TCPH_HUMAN       | T-complex protein 1 subunit eta                                                                                 | 65           | 3              |
| A0A140VJW2_HUMAN | Stathmin                                                                                                        | 63           | 1              |
| A0A0S2Z4A5_HUMAN | DNA replication licensing factor MCM7<br>(Fragment)                                                             | 63           | 3              |
| B4DDU6_HUMAN     | cDNA FLJ50442, highly similar to T-<br>complex protein 1 subunit epsilon                                        | 62           | 3              |
| HNRPL_HUMAN      | Heterogeneous nuclear ribonucleoprotein L                                                                       | 61           | 3              |
| PPIB_HUMAN       | Peptidyl-prolyl cis-trans isomerase B                                                                           | 58           | 4              |
| EF2_HUMAN        | Elongation factor 2                                                                                             | 58           | 4              |
| HSF2_HUMAN       | Heat shock factor protein 2                                                                                     | 55           | 2              |
| A0A0S2Z4Z9_HUMAN | Non-POU domain containing octamer-<br>binding isoform 1 (Fragment)                                              | 52           | 2              |
| RS10_HUMAN       | 40S ribosomal protein S10                                                                                       | 52           | 3              |
| Q2TSD0_HUMAN     | Glyceraldehyde-3-phosphate dehydrogenase                                                                        | 51           | 1              |
| SYTC_HUMAN       | Threonine--tRNA ligase, cytoplasmic                                                                             | 49           | 1              |
| A0A024QZX3_HUMAN | Serpin peptidase inhibitor, clade B<br>(Ovalbumin), member 6, isoform CRA_a                                     | 48           | 1              |
| A0A087WTP3_HUMAN | Far upstream element-binding protein 2                                                                          | 48           | 3              |
| H0Y2W2_HUMAN     | ATPase family AAA domain-containing<br>protein 3A (Fragment)                                                    | 47           | 3              |
| Q59ET3_HUMAN     | Chaperonin containing TCP1, subunit 6A<br>isoform a variant (Fragment)                                          | 47           | 1              |
| H0Y4R1_HUMAN     | Inosine-5'-monophosphate dehydrogenase 2<br>(Fragment)                                                          | 47           | 2              |
| A0A024R2T6_HUMAN | DEAH (Asp-Glu-Ala-His) box polypeptide<br>30, isoform CRA_b                                                     | 47           | 3              |
| ATX2L_HUMAN      | Ataxin-2-like protein                                                                                           | 45           | 4              |
| TCPQ_HUMAN       | T-complex protein 1 subunit theta                                                                               | 44           | 1              |
| E9PBF6_HUMAN     | Lamin-B1                                                                                                        | 43           | 4              |
| J3QRS3_HUMAN     | Myosin regulatory light chain 12A                                                                               | 43           | 2              |
| A0A2P9AP59_HUMAN | Uncharacterized protein                                                                                         | 42           | 1              |
| TCPA_HUMAN       | T-complex protein 1 subunit alpha                                                                               | 42           | 3              |
| A0A024R599_HUMAN | Solute carrier family 3 (Activators of dibasic<br>and neutral amino acid transport), member<br>2, isoform CRA_e | 41           | 2              |
| A0A2R8Y5P9_HUMAN | Protein Shroom3                                                                                                 | 41           | 3              |
| TCP4_HUMAN       | Activated RNA polymerase II<br>transcriptional coactivator p15                                                  | 41           | 2              |
| VIME_HUMAN       | Vimentin                                                                                                        | 41           | 2              |
| L0R5A1_HUMAN     | Alternative protein CSF2RB                                                                                      | 40           | 2              |

| Accession        | Protein description                                                                      | Score | Matches |
|------------------|------------------------------------------------------------------------------------------|-------|---------|
| B4DP70_HUMAN     | cDNA FLJ51017, highly similar to ATP-dependent RNA helicase DDX1 (EC 3.6.1.-) (Fragment) | 40    | 2       |
| A0A024RDB2_HUMAN | Ras-GTPase activating protein SH3 domain-binding protein 2, isoform CRA_b                | 40    | 1       |
| A0A087X2G1_HUMAN | ATP-dependent RNA helicase DDX1                                                          | 39    | 3       |
| A0A024R0Y6_HUMAN | ADP-ribosylation factor 3, isoform CRA_b                                                 | 39    | 1       |
| B4DWL1_HUMAN     | cDNA FLJ59240, highly similar to Far upstream element-binding protein 1                  | 39    | 1       |
| A0A090N8Y2_HUMAN | Protein disulfide-isomerase A4                                                           | 39    | 1       |
| A0A024R1N1_HUMAN | Myosin, heavy polypeptide 9, non-muscle, isoform CRA_a                                   | 38    | 4       |
| NSUN2_HUMAN      | tRNA (cytosine(34)-C(5))-methyltransferase                                               | 38    | 1       |
| D3DTW3_HUMAN     | Insulin-like growth factor 2 mRNA binding protein 1 deltaN CRDBP                         | 37    | 1       |
| J3KR24_HUMAN     | Isoleucine--tRNA ligase, cytoplasmic                                                     | 36    | 2       |
| THIO_HUMAN       | Thioredoxin                                                                              | 36    | 1       |
| B2RU06_HUMAN     | eIF4G1 protein                                                                           | 35    | 1       |
| A0A0B4J220_HUMAN | Chromosome 11 open reading frame 48, isoform CRA_c                                       | 35    | 2       |
| A0A2Q2TH77_HUMAN | Golgin subfamily A member 2                                                              | 35    | 3       |
| TR150_HUMAN      | Thyroid hormone receptor-associated protein 3                                            | 35    | 1       |
| A0A075B793_HUMAN | GRIP1-associated protein 1                                                               | 34    | 1       |
| A0A024R321_HUMAN | Filamin B, beta (Actin binding protein 278), isoform CRA_a                               | 34    | 1       |
| CEBPB_HUMAN      | CCAAT/enhancer-binding protein beta                                                      | 33    | 1       |
| A0A024QZD1_HUMAN | Ribosomal protein L18, isoform CRA_c                                                     | 33    | 1       |
| WDR1_HUMAN       | WD repeat-containing protein 1                                                           | 32    | 1       |
| ABCAA_HUMAN      | ATP-binding cassette sub-family A member 10                                              | 32    | 1       |
| A1L4G8_HUMAN     | C18orf34 protein                                                                         | 32    | 1       |
| SF3B3_HUMAN      | Splicing factor 3B subunit 3                                                             | 32    | 1       |
| ZN326_HUMAN      | DBIRD complex subunit ZNF326                                                             | 32    | 1       |
| SF3B2_HUMAN      | Splicing factor 3B subunit 2                                                             | 32    | 1       |
| PLEC_HUMAN       | Plectin                                                                                  | 31    | 1       |
| HNRPR_HUMAN      | Heterogeneous nuclear ribonucleoprotein R                                                | 31    | 3       |
| ASGR1_HUMAN      | Asialoglycoprotein receptor 1                                                            | 29    | 1       |
| H3BRD5_HUMAN     | Unconventional myosin-IXa                                                                | 29    | 1       |
| Q6MZK8_HUMAN     | Uncharacterized protein DKFZp686K06110                                                   | 28    | 2       |
| H0Y403_HUMAN     | Juxtaposed with another zinc finger protein 1 (Fragment)                                 | 28    | 2       |
| SYRC_HUMAN       | Arginine--tRNA ligase, cytoplasmic                                                       | 28    | 2       |

| Accession        | Protein description                                                                                                        | Score | Matches |
|------------------|----------------------------------------------------------------------------------------------------------------------------|-------|---------|
| B4DN52_HUMAN     | cDNA FLJ55990, highly similar to LIM domain and actin-binding protein 1                                                    | 28    | 1       |
| A0A0A0MSM0_HUMAN | Heat shock protein 105 kDa                                                                                                 | 27    | 1       |
| MMP3_HUMAN       | Stromelysin-1                                                                                                              | 27    | 1       |
| B4DUF2_HUMAN     | cDNA FLJ50227, moderately similar to Complement decay-accelerating factor cDNA FLJ36887 fis, clone                         | 27    | 1       |
| Q8N9M2_HUMAN     | BNGH42005504, highly similar to 26S PROTEASOME REGULATORY SUBUNIT S3                                                       | 27    | 2       |
| E1CKY7_HUMAN     | Protein phosphatase 1 regulatory subunit 12B                                                                               | 27    | 1       |
| D2SNZ4_HUMAN     | Proline rich 11, isoform CRA_a                                                                                             | 27    | 1       |
| KHDR1_HUMAN      | KH domain-containing, RNA-binding, signal transduction-associated protein 1                                                | 27    | 1       |
| B7Z1Q2_HUMAN     | cDNA FLJ61102, highly similar to Growth-arrest-specific protein 7                                                          | 27    | 1       |
| A0A2P9AHE1_HUMAN | Putative oxidoreductase with FAD-binding domain                                                                            | 26    | 1       |
| A0A024R8I8_HUMAN | Chromosome 9 open reading frame 140, isoform CRA_a                                                                         | 26    | 1       |
| CO6A5_HUMAN      | Collagen alpha-5(VI) chain                                                                                                 | 26    | 1       |
| A0A2P9AXY1_HUMAN | Excinuclease ABC subunit C (Modular protein)                                                                               | 25    | 1       |
| RAB20_HUMAN      | Ras-related protein Rab-20                                                                                                 | 24    | 1       |
| A0A2P9AUT9_HUMAN | Adenine deaminase                                                                                                          | 24    | 1       |
| A0A2P9ATJ5_HUMAN | Error-prone DNA polymerase 2                                                                                               | 24    | 1       |
| PYRG1_HUMAN      | CTP synthase 1                                                                                                             | 24    | 1       |
| A0A2P9AG47_HUMAN | Transcriptional regulator                                                                                                  | 23    | 1       |
| A0A090N7X1_HUMAN | ATP-binding cassette, sub-family F (GCN20), member 2                                                                       | 23    | 1       |
| ZN723_HUMAN      | Zinc finger protein 723                                                                                                    | 22    | 1       |
| TRI25_HUMAN      | E3 ubiquitin/ISG15 ligase TRIM25                                                                                           | 22    | 1       |
| A0A2P9AAS4_HUMAN | Oxidoreductase                                                                                                             | 22    | 1       |
| B3KPZ3_HUMAN     | cDNA FLJ32490 fis, clone SKNSH1000301, highly similar to Epidermal growth factor receptor kinasesubstrate 8-like protein 1 | 22    | 1       |
| Q59HF2_HUMAN     | D site of albumin promoter (Albumin D-box) binding protein variant (Fragment)                                              | 21    | 1       |
| Q8N7E8_HUMAN     | cDNA FLJ25713 fis, clone TST05089                                                                                          | 20    | 1       |
| A0A2P9AIR9_HUMAN | Putative transcriptional regulator                                                                                         | 20    | 1       |
| FIP1_HUMAN       | Pre-mRNA 3'-end-processing factor FIP1                                                                                     | 18    | 1       |

| <b>Accession</b> | <b>Protein description</b>                                           | <b>Score</b> | <b>Matches</b> |
|------------------|----------------------------------------------------------------------|--------------|----------------|
| H3BPW6_HUMAN     | Obscurin (Fragment)                                                  | 17           | 1              |
| A0A087X2D0_HUMAN | Serine/arginine-rich-splicing factor 3                               | 17           | 1              |
| ATRX_HUMAN       | Transcriptional regulator ATRX                                       | 17           | 1              |
| H0Y8L8_HUMAN     | Probable ATP-dependent RNA helicase<br>DDX41 (Fragment)              | 16           | 1              |
| E2AK2_HUMAN      | Interferon-induced, double-stranded RNA-<br>activated protein kinase | 16           | 1              |
| MYCN_HUMAN       | N-myc proto-oncogene protein                                         | 15           | 1              |
| BAZ2A_HUMAN      | Bromodomain adjacent to zinc finger<br>domain protein 2A             | 15           | 1              |
| ZN835_HUMAN      | Zinc finger protein 835                                              | 14           | 1              |

**Supplementary Table 2.** Correlations between USP44 expression levels and clinical features in patients with locoregionally advanced nasopharyngeal carcinoma.

| Characteristic          | Low Expression Group (%)<br><i>n</i> =235 | High Expression Group (%)<br><i>n</i> =141 | <i>P</i> -value |
|-------------------------|-------------------------------------------|--------------------------------------------|-----------------|
| Age                     |                                           |                                            |                 |
| ≤45                     | 126 (116.9)                               | 61 (70.1)                                  | 0.0518          |
| >45                     | 109 (118.1)                               | 80 (70.9)                                  |                 |
| Gender                  |                                           |                                            |                 |
| Male                    | 177 (176.3)                               | 105 (105.8)                                | 0.8536          |
| Female                  | 58 (58.8)                                 | 36 (35.3)                                  |                 |
| WHO type                |                                           |                                            |                 |
| IIa                     | 12 (11.9)                                 | 7 (7.1)                                    | 0.9515          |
| IIb                     | 223 (223.1)                               | 134 (133.9)                                |                 |
| TNM Stage               |                                           |                                            |                 |
| III                     | 134 (133.1)                               | 79 (79.9)                                  | 0.8508          |
| IV                      | 101 (101.9)                               | 62 (61.1)                                  |                 |
| VCA-IgA                 |                                           |                                            |                 |
| <1:80                   | 35 (32.5)                                 | 17 (19.5)                                  | 0.4404          |
| ≥1:80                   | 200 (202.5)                               | 124 (121.5)                                |                 |
| EA-IgA                  |                                           |                                            |                 |
| <1:10                   | 49 (47.5)                                 | 27 (28.5)                                  | 0.6907          |
| ≥1:10                   | 186 (187.5)                               | 114 (112.5)                                |                 |
| Locoregional recurrence |                                           |                                            |                 |
| Yes                     | 59 (43.1)                                 | 10 (25.9)                                  | <b>1.20E-05</b> |
| No                      | 176 (191.9)                               | 131 (115.1)                                |                 |
| Disease                 |                                           |                                            |                 |
| Yes                     | 122 (92.5)                                | 26 (55.5)                                  | <b>1.26E-10</b> |
| No                      | 113 (142.5)                               | 115 (85.5)                                 |                 |
| Death                   |                                           |                                            |                 |
| Yes                     | 95 (71.3)                                 | 19 (42.8)                                  | <b>3.71E-8</b>  |
| No                      | 140 (163.8)                               | 122 (98.3)                                 |                 |

The *P* values were determined using the two-tailed  $\chi^2$  test. Abbreviations: WHO type IIa, differentiated non-keratinizing nasopharyngeal carcinoma; WHO type IIb, undifferentiated non-keratinizing nasopharyngeal carcinoma; VCA-IgA, viral capsid antigen immunoglobulin A; EA-IgA, early antigen immunoglobulin A.

**Supplementary Table 3.** List of primers used in this study.

| <b>Gene</b>                     | <b>Sequence (5' to 3')</b>                                     |
|---------------------------------|----------------------------------------------------------------|
| <b>BSP PCR primers</b>          |                                                                |
| <i>USP44</i> -F                 | GGAATGGTTTTAGGAAGTTGA                                          |
| <i>USP44</i> -R                 | CTTACCCCCCTTCTCTCCAT                                           |
| <b>BSP sequencing primer</b>    |                                                                |
| <i>USP44</i>                    | GGTTTTAGGAAGTTGATTT                                            |
| <b>Real time RT-PCR primers</b> |                                                                |
| <i>USP44</i> -F                 | TCAGGTTACATGTCTTGCATGTG                                        |
| <i>USP44</i> -R                 | TACGCTTTGAGTTACACTGGT                                          |
| <i>Ku80</i> -F                  | TTGTCCAGGATGGAATTACTCTG                                        |
| <i>Ku80</i> -R                  | TCAAATACAGCTGCTGTGTC                                           |
| <i>TRIM25</i> -F                | AAAGCCACCAGCTCACATCCGA                                         |
| <i>TRIM25</i> -R                | GCGGTGTTGTAGTCCAGGATGA                                         |
| <i>GAPDH</i> -F                 | TGATGACATCAAGAAGGTGG                                           |
| <i>GAPDH</i> -R                 | TTGTCATACCAGGAAATGAGC                                          |
| <b>shRNA sequences</b>          |                                                                |
| shRNA- <i>USP44</i> -1-F        | CCGGCGGCAGGAATTGGAGTATCAACTCGAGTTGATA<br>CTCCAATTCCTGCCGTTTTTG |
| shRNA- <i>USP44</i> -1-R        | AATTCAAAAACGGCAGGAATTGGAGTATCAACTCGAG<br>TTGATACTCCAATTCCTGCCG |
| shRNA- <i>USP44</i> -2-F        | CCGGCCTCGTCTAATGAAATCCTTACTCGAGTAAGGAT<br>TTCATTAGACGAGGTTTTTG |
| shRNA- <i>USP44</i> -2-R        | AATTCAAAAACCTCGTCTAATGAAATCCTTACTCGAGT<br>AAGGATTCATTAGACGAGG  |
| <b>siRNA sequences</b>          |                                                                |
| siRNA- <i>TRIM25</i>            | CAGCAAGCTTCCCACGTTT                                            |
| siRNA- <i>Ku70</i>              | GTTCTATGGTACCGAGAAA                                            |
| <b>sgRNA sequences</b>          |                                                                |
| sgRNA- <i>USP44</i> -1-F        | CACCGTATCACTGCACAACTCGTAG                                      |
| sgRNA- <i>USP44</i> -1-R        | AAACCTACGAGTTGTGCAGTGATAC                                      |
| sgRNA- <i>USP44</i> -2-F        | CACCGTATTGGCCTTCGTTTAACTG                                      |
| sgRNA- <i>USP44</i> -2-R        | AAACCAGTTAAACGAAGGCCAATAC                                      |
| sgRNA- <i>USP44</i> -3-F        | CACCGTTGTTGGGCGTAACCACGAA                                      |
| sgRNA- <i>USP44</i> -3-R        | AAACTTCGTGGTTACGCCCAACAAC                                      |
| sgRNA- <i>TRIM25</i> -1-F       | CACCGAACACGGTGCTGTGCAACG                                       |
| sgRNA- <i>TRIM25</i> -1-R       | AAACCGTTGCACAGCACCGTGTTT                                       |
| sgRNA- <i>TRIM25</i> -2-F       | CACCGAGCCGGTCACCACTCCGTG                                       |
| sgRNA- <i>TRIM25</i> -2-R       | AAACCACGGAGTGGTGACCGGCTC                                       |
| sgRNA- <i>TRIM25</i> -3-F       | CACCGACCCAGCCCGAATGCCCAGG                                      |
| sgRNA- <i>TRIM25</i> -3-R       | AAACCCTGGGCATTCGGGCTGGGTC                                      |



**Supplementary Table 4.** List of antibodies used in this study.

| <b>Antibody</b>                                                         | <b>Company</b> | <b>Catalog no.</b> | <b>Dilution</b> |
|-------------------------------------------------------------------------|----------------|--------------------|-----------------|
| <b>Western blot</b>                                                     |                |                    |                 |
| Alpha Tubulin Antibody, Mouse Monoclonal                                | Proteintech    | 66031-1-Ig         | 1:1000          |
| Anti-GAPDH antibody, Mouse Monoclonal                                   | Sigma          | G8795              | 1:2000          |
| Anti-USP44 Antibody, Rabbit Polyclonal                                  | Abcam          | ab205032           | 1:200           |
| XRCC5/Ku80 Antibody, Rabbit Polyclonal                                  | Proteintech    | 16389-1-AP         | 1:500           |
| Ku70 Antibody, Rabbit Polyclonal                                        | Proteintech    | 10723-1-AP         | 1:500           |
| TRIM25 Antibody, Rabbit Polyclonal                                      | Proteintech    | 12573-1-AP         | 1:500           |
| Anti-HA antibody produced in rabbit                                     | Sigma          | H6908              | 1:1000          |
| ANTI-FLAG <sup>®</sup> M2 antibody produced in mouse                    | Sigma          | F1804              | 1:500           |
| MYC-Tag Antibody, Rabbit Polyclonal                                     | Proteintech    | 16286-1-AP         | 1:2000          |
| Phospho-Histone H2A.X (Ser139) (20E3), Rabbit mAb                       | CST            | 9718S              | 1:1000          |
| Anti-mouse IgG, HRP-linked Antibody                                     | CST            | 7076S              | 1:5000          |
| Anti-rabbit IgG, HRP-linked Antibody                                    | CST            | 7074S              | 1:5000          |
| <b>Immunohistochemistry</b>                                             |                |                    |                 |
| TRIM25 Antibody, Rabbit Polyclonal                                      | Proteintech    | 12573-1-AP         | 1:100           |
| XRCC5/Ku80 Antibody, Rabbit Polyclonal                                  | Proteintech    | 16389-1-AP         | 1:100           |
| Caspase3 antibody, Rabbit Polyclonal                                    | Genetex        | GTX110543          | 1:200           |
| Anti-USP44 Antibody, Rabbit Polyclonal                                  | Abcam          | ab205032           | 1:100           |
| <b>Immunofluorescence</b>                                               |                |                    |                 |
| Anti-HA antibody produced in mouse                                      | Sigma          | H3663              | 1:400           |
| XRCC5 Antibody, Mouse Monoclonal                                        | Proteintech    | 66546-1-Ig         | 1:2000          |
| XRCC5/Ku80 Antibody, Rabbit Polyclonal                                  | Proteintech    | 16389-1-AP         | 1:80            |
| TRIM25 Antibody, Rabbit Polyclonal                                      | Proteintech    | 12573-1-AP         | 1:60            |
| Phospho-Histone H2A.X (Ser139) (20E3), Rabbit mAb                       | CST            | 9718S              | 1:150           |
| Donkey anti-mouse, Alexa Fluor <sup>®</sup> 488 IgG secondary antibody  | Life           | A21202             | 1:1000          |
| Donkey anti-rabbit, Alexa Fluor <sup>®</sup> 594 IgG secondary antibody | Life           | A21207             | 1:1000          |
| <b>Co-Immunoprecipitation</b>                                           |                |                    |                 |
| Anti-HA antibody produced in rabbit                                     | Sigma          | H6908              | 3ug             |
| ANTI-FLAG <sup>®</sup> M2 antibody produced in mouse                    | Sigma          | F1804              | 3ug             |
| MYC-Tag Antibody, Rabbit Polyclonal                                     | Proteintech    | 16286-1-AP         | 3ug             |
| Normal Mouse IgG                                                        | Invitrogen     | 10400C             | 3ug             |
| Normal Rabbit IgG                                                       | Invitrogen     | 10500C             | 3ug             |
| TRIM25 Antibody, Rabbit Polyclonal                                      | Proteintech    | 12573-1-AP         | 3ug             |
