# Supplementary material for: USP44 regulates irradiation-induced DNA double-strand break repair and suppresses tumorigenesis in nasopharyngeal carcinoma
Source: PubMed Central journal article supplement (PMC8789930; doi:10.1038/s41467-022-28158-2), 2022-01-25
Supplement: 41467_2022_28158_MOESM3_ESM.pdf [file 41467_2022_28158_MOESM3_ESM.pdf]

## Reporting Summary

Nature Portfolio wishes to improve the reproducibility of the work that we publish. This form provides structure for consistency and transparency in reporting. For further information on Nature Portfolio policies, see our [Editorial Policies](#) and the [Editorial Policy Checklist](#).

### Statistics

For all statistical analyses, confirm that the following items are present in the figure legend, table legend, main text, or Methods section.

- | n/a                                 | Confirmed                                                                                                                                                                                                                                                                                      |
|-------------------------------------|------------------------------------------------------------------------------------------------------------------------------------------------------------------------------------------------------------------------------------------------------------------------------------------------|
| <input type="checkbox"/>            | <input checked="" type="checkbox"/> The exact sample size ( $n$ ) for each experimental group/condition, given as a discrete number and unit of measurement                                                                                                                                    |
| <input type="checkbox"/>            | <input checked="" type="checkbox"/> A statement on whether measurements were taken from distinct samples or whether the same sample was measured repeatedly                                                                                                                                    |
| <input type="checkbox"/>            | <input checked="" type="checkbox"/> The statistical test(s) used AND whether they are one- or two-sided<br><i>Only common tests should be described solely by name; describe more complex techniques in the Methods section.</i>                                                               |
| <input checked="" type="checkbox"/> | <input type="checkbox"/> A description of all covariates tested                                                                                                                                                                                                                                |
| <input checked="" type="checkbox"/> | <input type="checkbox"/> A description of any assumptions or corrections, such as tests of normality and adjustment for multiple comparisons                                                                                                                                                   |
| <input type="checkbox"/>            | <input checked="" type="checkbox"/> A full description of the statistical parameters including central tendency (e.g. means) or other basic estimates (e.g. regression coefficient) AND variation (e.g. standard deviation) or associated estimates of uncertainty (e.g. confidence intervals) |
| <input type="checkbox"/>            | <input checked="" type="checkbox"/> For null hypothesis testing, the test statistic (e.g. $F$ , $t$ , $r$ ) with confidence intervals, effect sizes, degrees of freedom and $P$ value noted<br><i>Give <math>P</math> values as exact values whenever suitable.</i>                            |
| <input checked="" type="checkbox"/> | <input type="checkbox"/> For Bayesian analysis, information on the choice of priors and Markov chain Monte Carlo settings                                                                                                                                                                      |
| <input checked="" type="checkbox"/> | <input type="checkbox"/> For hierarchical and complex designs, identification of the appropriate level for tests and full reporting of outcomes                                                                                                                                                |
| <input checked="" type="checkbox"/> | <input type="checkbox"/> Estimates of effect sizes (e.g. Cohen's $d$ , Pearson's $r$ ), indicating how they were calculated                                                                                                                                                                    |

*Our web collection on [statistics for biologists](#) contains articles on many of the points above.*

### Software and code

Policy information about [availability of computer code](#)

**Data collection** The cell cycle distribution was detected using an ACEA NovoCyte flow cytometer and analysed with NovoExpress 1.3.0 software. The apoptosis rate was detected using a cytoFLEX flow cytometer and analysed with CytExpert 2.2 software. The quantitation of tail moments was analysed with CaspLab-Comet Assay Software.

**Data analysis** All statistical analyses were performed using the SPSS version 22.0 statistical software and Graph-Pad Prism version 6.0.1 software.

For manuscripts utilizing custom algorithms or software that are central to the research but not yet described in published literature, software must be made available to editors and reviewers. We strongly encourage code deposition in a community repository (e.g. GitHub). See the Nature Portfolio [guidelines for submitting code & software](#) for further information.

### Data

Policy information about [availability of data](#)

All manuscripts must include a [data availability statement](#). This statement should provide the following information, where applicable:

- Accession codes, unique identifiers, or web links for publicly available datasets
- A description of any restrictions on data availability
- For clinical datasets or third party data, please ensure that the statement adheres to our [policy](#)

The microarray data used in this study are available in the Gene Expression Omnibus (GEO; <http://www.ncbi.nlm.nih.gov/geo/>) under accession codes GSE12452, GSE52068 and GSE62336. The data used in this study for gene expression profiling interactive analysis (GEPIA; <http://gepia.cancer-pku.cn/index.html>) are available in The Cancer Genome Atlas (TCGA; <https://tcga-data.nci.nih.gov/>). All the other data supporting the findings of this study are available within the article and its Supplementary Information files. The key raw data have been deposited to Research Data Deposit public platform (<https://www.researchdata.org.cn/>), with an approval number of RDDB2021760690. Source data are provided with this paper.

## Field-specific reporting

Please select the one below that is the best fit for your research. If you are not sure, read the appropriate sections before making your selection.

Life sciences  Behavioural & social sciences  Ecological, evolutionary & environmental sciences

For a reference copy of the document with all sections, see [nature.com/documents/nr-reporting-summary-flat.pdf](https://www.nature.com/documents/nr-reporting-summary-flat.pdf)

## Life sciences study design

All studies must disclose on these points even when the disclosure is negative.

|                 |                                                                                                                                                                                                                                                                                                                           |
|-----------------|---------------------------------------------------------------------------------------------------------------------------------------------------------------------------------------------------------------------------------------------------------------------------------------------------------------------------|
| Sample size     | Sample sizes for each experiment are provided in figure legends. For in vitro assay, n=3. For in vivo assay, usually n=6 or n=10 mice were used. No statistical method was used to determine the sample size. The sample sizes are determined empirically, and are similar in size to most existing studies in the field. |
| Data exclusions | No data were excluded from the analyses.                                                                                                                                                                                                                                                                                  |
| Replication     | All attempts at replications were successful. Number of independent experiments and replicates are in the Statistics and Reproducibility section and the Figure legends section.                                                                                                                                          |
| Randomization   | The samples used in this study were randomly allocated into control or experimental groups.                                                                                                                                                                                                                               |
| Blinding        | The investigators were not blinded to sample allocation during experiment and outcome assessment, because results used were obtained using objective quantitative methods.                                                                                                                                                |

## Reporting for specific materials, systems and methods

We require information from authors about some types of materials, experimental systems and methods used in many studies. Here, indicate whether each material, system or method listed is relevant to your study. If you are not sure if a list item applies to your research, read the appropriate section before selecting a response.

### Materials & experimental systems

| n/a                                 | Involvement in the study                                        |
|-------------------------------------|-----------------------------------------------------------------|
| <input type="checkbox"/>            | <input checked="" type="checkbox"/> Antibodies                  |
| <input type="checkbox"/>            | <input checked="" type="checkbox"/> Eukaryotic cell lines       |
| <input checked="" type="checkbox"/> | <input type="checkbox"/> Palaeontology and archaeology          |
| <input type="checkbox"/>            | <input checked="" type="checkbox"/> Animals and other organisms |
| <input type="checkbox"/>            | <input checked="" type="checkbox"/> Human research participants |
| <input checked="" type="checkbox"/> | <input type="checkbox"/> Clinical data                          |
| <input checked="" type="checkbox"/> | <input type="checkbox"/> Dual use research of concern           |

### Methods

| n/a                                 | Involvement in the study                           |
|-------------------------------------|----------------------------------------------------|
| <input checked="" type="checkbox"/> | <input type="checkbox"/> ChIP-seq                  |
| <input type="checkbox"/>            | <input checked="" type="checkbox"/> Flow cytometry |
| <input checked="" type="checkbox"/> | <input type="checkbox"/> MRI-based neuroimaging    |

## Antibodies

### Antibodies used

Western blot  
 Alpha Tubulin Antibody, Mouse Monoclonal Proteintech 66031-1-Ig 1:1000  
 Anti-GAPDH antibody, Mouse Monoclonal Sigma G8795 1:2000  
 Anti-USP44 Antibody, Rabbit Polyclonal Abcam ab205032 1:200  
 XRCC5/Ku80 Antibody, Rabbit Polyclonal Proteintech 16389-1-AP 1:500  
 Ku70 Antibody, Rabbit Polyclonal Proteintech 10723-1-AP 1:500  
 TRIM25 Antibody, Rabbit Polyclonal Proteintech 12573-1-AP 1:500  
 Anti-HA antibody produced in rabbit Sigma H6908 1:1000  
 ANTI-FLAG® M2 antibody produced in mouse Sigma F1804 1:500  
 MYC-Tag Antibody, Rabbit Polyclonal Proteintech 16286-1-AP 1:2000  
 Phospho-Histone H2A.X (Ser139) (20E3), Rabbit mAb CST 9718S 1:1000  
 Anti-mouse IgG, HRP-linked Antibody CST 7076S 1:5000  
 Anti-rabbit IgG, HRP-linked Antibody CST 7074S 1:5000  
 Immunohistochemistry  
 TRIM25 Antibody, Rabbit Polyclonal Proteintech 12573-1-AP 1:100  
 XRCC5/Ku80 Antibody, Rabbit Polyclonal Proteintech 16389-1-AP 1:100  
 Caspase3 antibody, Rabbit Polyclonal Genetex GTX110543 1:200  
 Anti-USP44 Antibody, Rabbit Polyclonal Abcam ab205032 1:100  
 Immunofluorescence  
 Anti-HA antibody produced in mouse Sigma H3663 1:400  
 XRCC5 Antibody, Mouse Monoclonal Proteintech 66546-1-Ig 1:2000

XRCC5/Ku80 Antibody, Rabbit Polyclonal Proteintech 16389-1-AP 1:80  
 TRIM25 Antibody, Rabbit Polyclonal Proteintech 12573-1-AP 1:60  
 Phospho-Histone H2A.X (Ser139) (20E3), Rabbit mAb CST 9718S 1:150  
 Donkey anti-mouse, Alexa Fluor <sup>®</sup>488 IgG secondary antibody Life A21202 1:1000  
 Donkey anti-rabbit, Alexa Fluor <sup>®</sup>594 IgG secondary antibody Life A21207 1:1000  
 Co-Immunoprecipitation  
 Anti-HA antibody produced in rabbit Sigma H6908 3ug  
 ANTI-FLAG<sup>®</sup> M2 antibody produced in mouse Sigma F1804 3ug  
 MYC-Tag Antibody, Rabbit Polyclonal Proteintech 16286-1-AP 3ug  
 Normal Mouse IgG Invitrogen 10400C 3ug  
 Normal Rabbit IgG Invitrogen 10500C 3ug  
 TRIM25 Antibody, Rabbit Polyclonal Proteintech 12573-1-AP 3ug

## Validation

All antibodies were validated by western blot, immunohistochemistry, immunofluorescence or co-immunoprecipitation prior to isotope-polymer conjugation. Additional supporting documentation, references, and validation statements are available at the manufacturer's website.

## Eukaryotic cell lines

### Policy information about [cell lines](#)

## Cell line source(s)

The immortalized normal human nasopharyngeal epithelial cell lines NP69 and human NPC cell lines (SUNE1, CNE1, CNE2, HNE1 and HONE1) were provided and authenticated by Professor Musheng Zeng (Sun Yat-sen University Cancer Center, China). HEK293T cell line was obtained from the American Type Tissue Culture Collection (ATCC).

## Authentication

None of the cell lines were authenticated.

## Mycoplasma contamination

All the cells were tested negative for mycoplasma contamination, and cultured for less than 2 months.

Commonly misidentified lines  
(See [ICLAC](#) register)

None.

## Animals and other organisms

### Policy information about [studies involving animals](#); [ARRIVE guidelines](#) recommended for reporting animal research

## Laboratory animals

Female BALB/c nude mice (6–8 weeks old) were purchased from Charles River Laboratories (Beijing, China) and housed in barrier facilities on a 12 h light/dark cycle at temperature 18–22 °C and humidity 50–60%.

## Wild animals

The study did not involve wild animals.

## Field-collected samples

The study did not involve samples collected from the field.

## Ethics oversight

All experimental protocols were approved by the Institutional Animal Care and Use Committee of Sun Yat-Sen University (approval number: L102012016030B) and complied with the Declaration of Helsinki.

Note that full information on the approval of the study protocol must also be provided in the manuscript.

## Human research participants

### Policy information about [studies involving human research participants](#)

## Population characteristics

The clinical features of patients participated in the study were showed in Supplementary Table 1.

## Recruitment

We randomly collected 19 fresh-frozen NPC specimens and 17 normal nasopharyngeal epithelial specimens, as well as 376 paraffin-embedded locoregionally advanced NPC specimens between January 2006 and December 2009, from Sun Yat-sen University Cancer Center (Guangzhou, China). There is no potential self-selection bias or other biases.

## Ethics oversight

Our study was approved by the Institutional Ethical Review Boards of Sun Yat-sen University Cancer Center and the requirement for informed consent was waived by the ethics review boards (approval number: GZR2015-060). This study was conducted according to the REporting recommendations for tumour MARKer prognostic studies (REMARK) guidelines.

Note that full information on the approval of the study protocol must also be provided in the manuscript.

## Flow Cytometry

### Plots

Confirm that:

- The axis labels state the marker and fluorochrome used (e.g. CD4-FITC).
- The axis scales are clearly visible. Include numbers along axes only for bottom left plot of group (a 'group' is an analysis of identical markers).
- All plots are contour plots with outliers or pseudocolor plots.
- A numerical value for number of cells or percentage (with statistics) is provided.

### Methodology

Sample preparation

The Cell Cycle and Apoptosis Kit (Keygen Biotech) was applied to detect the cell cycle distribution and apoptosis rate of each sample. For cell cycle analysis, serum-starved cells were collected 8 h after 6-Gy IR or no IR, washed in PBS and fixed in 70% ice-cold ethanol overnight. After washing, each sample was stained with 500  $\mu$ l RNase A: PI (1:9, v/v) dyeing solution and screened. For apoptosis analysis, cells were collected 24 h after 6-Gy IR or no IR and washed twice with PBS. Each sample was resuspended in 500  $\mu$ l binding buffer, screened and incubated with 5  $\mu$ l Annexin V-FITC and 5  $\mu$ l PI fluorescent dyes. FITC-/PI- cells were considered viable cells, FITC+/PI- cells were considered early apoptotic cells and FITC+/PI+ cells were considered late apoptotic or dead cells. For the NHEJ reporter assay, the EJ5-GFP plasmid was generously provided by Professor Muyan Cai (Sun Yat-sen University Cancer Center, China). The indicated cells were seeded in 6-well plates, transfected with EJ5-GFP and infected with I-SceI-expressing adenovirus after 18 h. The medium was replaced after 14 h to avoid adenovirus toxicity. Cells were harvested after 72 h.

Instrument

The cell cycle distribution was detected using an ACEA NovoCyte flow cytometer. The apoptosis rate and GFP-positive cells were detected using a cytoFLEX flow cytometer.

Software

The cell cycle distribution was analysed with NovoExpress 1.3.0 software. The apoptosis rate and GFP-positive cells were analysed with CytExpert 2.2 software.

Cell population abundance

10000 cells in P2 gates were counted for cell cycle analysis. 20,000 cells were counted for apoptosis analysis. 10,000 cells were counted for NHEJ reporter assay.

Gating strategy

For cell cycle analysis, the percentage of PE-A-positive cells was determined upon gating strategy: i) FSC-A vs SSC-A to isolate cells from debris, ii) PE-A vs PE-H to isolate single cells and iii) PE-A for detection of PE-A positive population. For apoptosis analysis, the percentage of viable cells, early apoptotic cells or late apoptotic cells were determined upon gating strategy: i) FSC-A vs SSC-A to isolate cells from debris, ii) FSC-A vs FSC-H to isolate single cells and iii) FITC-A vs PI-A to detect the population of viable cells, early apoptotic cells or late apoptotic cells. For GFP-positive cells analysis, the percentage of GFP-positive cells was determined upon gating strategy: i) FSC-A vs SSC-A to isolate cells from debris, ii) FSC-Width vs FSC-A to isolate single cells and iii) FSC-A vs FITC-A for detection of GFP-positive population.

- Tick this box to confirm that a figure exemplifying the gating strategy is provided in the Supplementary Information.
